1 **GABAergic neuron-to-glioma synapses in diffuse midline gliomas**

2

3 Tara Barron<sup>1</sup>, Belgin Yalçın<sup>1</sup>, Aaron Mochizuki<sup>1</sup>, Evan Cantor<sup>2</sup>, Kiarash Shamardani<sup>1</sup>,

4 Dana Tlais<sup>1</sup>, Andrea Franson<sup>2</sup>, Samantha Lyons<sup>2</sup>, Vilina Mehta<sup>1</sup>, Samin Maleki Jahan<sup>1</sup>,

5 Kathryn R. Taylor<sup>1</sup>, Michael B. Keough<sup>1</sup>, Haojun Xu<sup>1</sup>, Minhui Su<sup>1</sup>, Michael A. Quezada<sup>1</sup>,

6 Pamelyn J Woo<sup>1</sup>, Paul G. Fisher<sup>1</sup>, Cynthia J. Campen<sup>1</sup>, Sonia Partap<sup>1</sup>, Carl Koschmann<sup>2</sup>,

7 Michelle Monje<sup>1,3,\*</sup>

8

9 1 Department of Neurology and Neurological Sciences, Stanford University, Stanford  
10 CA 94305 USA

11

12 2 Department of Pediatric Hematology/Oncology, University of Michigan, Ann Arbor  
13 Michigan USA

14

15 3 Howard Hughes Medical Institute, Stanford University, Stanford CA 94305 USA

16

17 \*Please send correspondence to: Michelle Monje MD PhD ([mmonje@stanford.edu](mailto:mmonje@stanford.edu))

18

## 19 **Abstract**

20 Pediatric high-grade gliomas are the leading cause of brain cancer-related death  
21 in children. High-grade gliomas include clinically and molecularly distinct subtypes that  
22 stratify by anatomical location into diffuse midline gliomas (DMG) such as diffuse intrinsic  
23 pontine glioma (DIPG) and hemispheric high-grade gliomas. Neuronal activity drives high-  
24 grade glioma progression both through paracrine signaling<sup>1,2</sup> and direct neuron-to-glioma  
25 synapses<sup>3-5</sup>. Glutamatergic, AMPA receptor-dependent synapses between neurons and  
26 malignant glioma cells have been demonstrated in both pediatric<sup>3</sup> and adult high-grade  
27 gliomas<sup>4</sup>, but neuron-to-glioma synapses mediated by other neurotransmitters remain  
28 largely unexplored. Using whole-cell patch clamp electrophysiology, *in vivo* optogenetics  
29 and patient-derived glioma xenograft models, we have now identified functional, tumor-  
30 promoting GABAergic neuron-to-glioma synapses mediated by GABA<sub>A</sub> receptors in  
31 DMGs. GABAergic input has a depolarizing effect on DMG cells due to NKCC1  
32 expression and consequently elevated intracellular chloride concentration in DMG tumor  
33 cells. As membrane depolarization increases glioma proliferation<sup>3</sup>, we find that the activity  
34 of GABAergic interneurons promotes DMG proliferation *in vivo*. Increasing GABA  
35 signaling with the benzodiazepine lorazepam – a positive allosteric modulator of GABA<sub>A</sub>  
36 receptors commonly administered to children with DMG for nausea or anxiety - increases  
37 GABA<sub>A</sub> receptor conductance and increases glioma proliferation in orthotopic xenograft  
38 models of DMG. Conversely, levetiracetam, an anti-epileptic drug that attenuates  
39 GABAergic neuron-to-glioma synaptic currents, reduces glioma proliferation in patient-  
40 derived DMG xenografts and extends survival of mice bearing DMG xenografts.  
41 Concordant with gene expression patterns of GABA<sub>A</sub> receptor subunit genes across  
42 subtypes of glioma, depolarizing GABAergic currents were not found in hemispheric high-  
43 grade gliomas. Accordingly, neither lorazepam nor levetiracetam influenced the growth  
44 rate of hemispheric high-grade glioma patient-derived xenograft models. Retrospective  
45 real-world clinical data are consistent with these conclusions and should be replicated in  
46 future prospective clinical studies. Taken together, these findings uncover GABAergic  
47 synaptic communication between GABAergic interneurons and diffuse midline glioma  
48 cells, underscoring a tumor subtype-specific mechanism of brain cancer neurophysiology  
49 with important potential implications for commonly used drugs in this disease context.  
50

## 51 **Introduction**

52 Diffuse midline glioma (DMG), which occurs most commonly in the brainstem and is also  
53 known as diffuse intrinsic pontine glioma (DIPG), is a lethal childhood central nervous  
54 system cancer with few therapeutic options and a median survival of only 10-13 months<sup>6,7</sup>.  
55 The majority of DMGs exhibit a mutation in genes encoding histone H3 (H3K27M), and  
56 occur in the brainstem, thalamus and spinal cord<sup>8-10</sup>. Multiple lines of evidence support

57 the concept that DMG originates from oligodendroglial lineage precursor cells<sup>11-15</sup>. During  
58 postnatal development and adulthood, oligodendroglial precursor cells (OPCs)  
59 communicate with neurons through both paracrine factor signaling<sup>16-18</sup> and through  
60 glutamatergic and GABAergic neuron-to-OPC synapses<sup>19-23</sup>; oligodendroglial precursor  
61 cell proliferation is robustly regulated by neuronal activity<sup>24</sup>. Similar to these effects on  
62 their normal cellular counterparts, glutamatergic neuronal activity drives the proliferation  
63 and growth of DMG and other high-grade<sup>1,4,25,26</sup> and low-grade<sup>2</sup> gliomas. The  
64 mechanisms by which neuronal activity promotes glioma progression include activity-  
65 regulated paracrine factor secretion<sup>1,2,25,26</sup> as well as electrochemical communication  
66 through AMPA ( $\alpha$ -amino-3-hydroxy-5-methyl-4-isoxazole propionic acid) receptor  
67 (AMPA)-mediated neuron-to-glioma synapses<sup>3,4</sup> and activity-dependent, potassium-  
68 evoked glioma currents that are evident in both pediatric and adult forms of high-grade  
69 gliomas<sup>3,4</sup>. Depolarizing current alone is sufficient to drive malignant glioma growth in  
70 orthotopic xenograft models<sup>3</sup>, underscoring the need for a comprehensive understanding  
71 of electrochemical mechanisms that enable glioma membrane depolarization in each  
72 molecularly distinct form of glioma. Here, we explore whether GABAergic synapses exist  
73 between GABAergic interneurons and DMG cells and test the hypothesis that putative  
74 GABAergic synaptic signaling is depolarizing and promotes tumor progression in  
75 H3K27M-altered DMG.

76

## 77 **Results**

### 78 **GABA<sub>A</sub> receptor and postsynaptic gene expression in DMG**

79 To determine whether genes involved in GABAergic synaptic transmission are  
80 expressed in high-grade gliomas, we analyzed single-cell RNAseq datasets from primary  
81 patient tumor samples of H3K27M+ DMG cells, IDH wild-type (WT) hemispheric high-  
82 grade glioma cells, IDH mutant (mut) hemispheric high-grade glioma cells, and tumor-  
83 associated non-malignant oligodendrocytes (OLs). H3K27M+ DMG cells broadly  
84 expressed GABA<sub>A</sub> receptor subunit genes, including  $\alpha$  and  $\beta$  subunits, as well as  
85 ARHGEF9, GPHN, and NLGN2, which are associated with GABAergic post-synaptic  
86 regions (Figure 1a). These genes were expressed to a much greater extent in H3K27M+  
87 DMG cells than in IDH WT high-grade gliomas (Figure 1a).

88

### 89 **Functional GABAergic neuron-glioma synapses**

90 To determine whether putative functional GABAergic neuron-glioma synapses  
91 exist, we performed electrophysiological recordings from xenografted H3K27M+ DMG  
92 cells in response to stimulation of local GABAergic interneurons. Green fluorescent  
93 protein (GFP)-expressing glioma cells were xenografted into the CA1 region of the  
94 hippocampus, a well-defined circuit in which neuron-to-glioma synapses have been  
95 previously reported<sup>3</sup> and allowed to engraft and grow for at least 8 weeks. Acute  
96 hippocampal sections were prepared from these mice, and DMG cell responses to  
97 electrical stimulation of local neurons with a bipolar stimulator were recorded using whole-  
98 cell patch clamp electrophysiology (Figure 1b). Using a high Cl<sup>-</sup> internal solution and in  
99 the presence of AMPAR antagonist NBQX (2,3-dihydroxy-6-nitro-7-sulfamoyl-  
100 benzo[f]quinoxaline) to inhibit AMPAR-mediated currents, local stimulation led to an  
101 inward current in DMG cells recorded in voltage clamp (Figure 1c). This current was

102 blocked with perfusion of picrotoxin (PTX), a GABA<sub>A</sub> receptor inhibitor, indicating that  
103 these synaptic currents are mediated by GABA. GABAergic neuron-to-glioma synapses  
104 were observed in two distinct patient-derived xenograft models (Figure 1d). Cells were  
105 filled with Alexa Fluor 568 dye during electrophysiological recording and then slices were  
106 post-fixed, immunostained for tumor cell markers [GFP and human nuclear antigen  
107 (HNA)] and imaged on a confocal microscope to confirm that the cells recorded from were  
108 glioma cells (Figure 1e).

109

### 110 **GABA depolarizes DMG cells due to NKCC1-mediated high intracellular Cl<sup>-</sup>**

111 GABA<sub>A</sub> receptor activation can either depolarize or hyperpolarize a cell, depending  
112 on the intracellular Cl<sup>-</sup> concentration. In mature neurons, Cl<sup>-</sup> concentration is low, leading  
113 to an influx of Cl<sup>-</sup> through GABA<sub>A</sub> receptors and thus, hyperpolarization<sup>27</sup>. OPCs exhibit  
114 a high intracellular Cl<sup>-</sup> concentration, leading to an efflux of Cl<sup>-</sup> through GABA<sub>A</sub> receptors,  
115 and thus GABAergic neuron-to-OPC synapses cause depolarization<sup>20</sup>. Perforated patch  
116 recordings of xenografted H3K27M+ DMG cells using gramicidin-A revealed that local  
117 application of GABA induced an inward current in voltage clamp and corresponding  
118 depolarization in current clamp (Figure 2a-b). The effect of local GABA application on  
119 H3/IDH WT pediatric hemispheric glioblastoma (pGBM) was negligible in comparison  
120 (Figure 2a-b). PTX inhibited the current and depolarization in response to GABA  
121 application, indicating that GABA<sub>A</sub> receptors are responsible for this depolarizing effect.  
122 To determine the reversal potential of GABA<sub>A</sub> currents ( $E_{GABA}$ ) in H3K27M+ DMG and  
123 H3/IDH WT pGBM xenografts, we recorded response to local GABA application at varying  
124 holding potentials (Figure 2c). The currents in response to GABA were plotted against the

125 holding potentials, and  $E_{\text{GABA}}$  was found to be  $-19.61 \pm 8.29$  mV and  $-14.14 \pm 9.04$  mV for  
126 H3K27M+ DMG cells from two different patient-derived models (SU-DIPGVI and SU-  
127 DIPGXIII-FL, respectively) and  $-47.44 \pm 7.79$  mV for H3/IDH WT pGBM (Figure 2d;  
128 Extended Data Figure 1). Using these reversal potentials to calculate the intracellular  $\text{Cl}^-$   
129 concentration of each glioma type, we find the intracellular  $\text{Cl}^-$  concentration of H3K27M+  
130 DMG cells to be 62.65 mM in SU-DIPGVI cells and 76.88 mM in SU-DIPGXIII-FL cells,  
131 and that of H3/IDH WT pGBM to be 22.12 mM. During whole-cell recordings with high  $\text{Cl}^-$   
132 internal solution, the reversal potential was  $-0.41 \pm 12.98$  mV in H3K27M+ DMG cells,  
133 illustrating the critical role of chloride concentration gradients.

134 Cation–chloride cotransporters, such as the Na-K-Cl cotransporter NKCC1, have  
135 an important role in setting intracellular  $\text{Cl}^-$  concentration. *SLC12A2*, the gene that  
136 encodes for NKCC1, is expressed in H3K27M+ DMG (Figure 2e). To determine the role  
137 of NKCC1 in  $E_{\text{GABA}}$  in DMG cells, we used perforated patch to record the response to  
138 local GABA application in the presence of bumetanide, an NKCC1 inhibitor. After bath  
139 perfusion of bumetanide,  $E_{\text{GABA}}$  was shifted from  $-19.61 \pm 8.29$  mV to  $-54.20 \pm 8.19$  mV  
140 in H3K27M+ DMG cells (Figure 2f), a value similar to that found in H3/IDH WT pGBM  
141 cells (Figure 2d) indicating that NKCC1 function is critical for the depolarizing effect of  
142 GABA on these cells.

143

#### 144 **GABAergic interneurons increase DMG proliferation**

145 Past work has demonstrated that glutamatergic neuronal activity promotes glioma  
146 progression<sup>1-5</sup>, and that depolarization of glioma cells plays a central role in these effects  
147 of neuronal activity on glioma proliferation<sup>3</sup>. Since GABA has a depolarizing effect on

148 DMG cells as described above, we sought to determine whether GABAergic interneurons  
149 drive DMG proliferation through depolarizing GABAergic synaptic input. We first used  
150 whole-cell patch clamp electrophysiology to confirm that we could perform optogenetic  
151 and pharmacological targeting of GABAergic neuron-to-glioma synapses. We genetically  
152 expressed ChRmine, a red-shifted channelrhodopsin<sup>28</sup>, in Dlx-expressing GABAergic  
153 interneurons in the CA1 region of the hippocampus and recorded the response of  
154 xenografted glioma cells to 5 ms optogenetic stimulation of those neurons (Figure 3a).  
155 PTX-sensitive GABAergic post-synaptic currents in DMG cells were observed in response  
156 to optogenetic interneuron stimulation (Figure 3b). We also observed the tetrodotoxin  
157 (TTX)-sensitive prolonged currents, evoked by activity-dependent extracellular K<sup>+</sup>  
158 increase, that we have previously described<sup>3</sup> (Figure 3b). Whole cell patch clamp  
159 recordings of Dlx-ChRmine-expressing interneurons confirmed that optogenetic  
160 stimulation evoked depolarization (Extended Data Figure 2a). Pharmacological targeting  
161 of GABAergic neuron-to-glioma synaptic input using a benzodiazepine, lorazepam, which  
162 increases conductance of GABA<sub>A</sub> receptors, increased the amplitude of GABAergic post-  
163 synaptic currents in DMG cells (Figure 3c-e).

164 We next sought to test the effect of interneuron activity and GABAergic synaptic  
165 input into DMG cells *in vivo*. Dlx-ChRmine was expressed in hippocampal interneurons  
166 via AAV viral vector injection to the CA1 region, and *in vivo* optogenetic stimulation of  
167 interneuron activity was confirmed by expression of the immediate early gene cFos  
168 (Extended Data Figure 2b). Eleven weeks after injection of Dlx-ChRmine vector into the  
169 hippocampus, and eight weeks after xenografting patient-derived H3K27M+ DMG cells  
170 to the same area, the CA1 region of the hippocampus was optogenetically stimulated

171 (595 nm light, 40 Hz, 30 sec on/90 sec off over 30 minutes) in awake, behaving mice to  
172 stimulate GABAergic interneuron activity (Figure 3f). Control mice were identically  
173 manipulated, but light was not delivered during mock optogenetic stimulation. The  
174 thymidine analogue EdU was administered systemically to mice at the time of optogenetic  
175 or mock stimulation to label proliferating cells, and glioma cell proliferation was analyzed  
176 24-hours later. *In vivo* optogenetic stimulation of GABAergic interneurons promoted  
177 proliferation of xenografted DMG cells (Figure 3g). Similarly, treatment of xenografted  
178 mice with lorazepam, which increases GABA<sub>A</sub> receptor signaling, exerted a dose-  
179 dependent proliferative effect on H3K27M+ DMG in each of three independent patient-  
180 derived orthotopic xenograft models (Figure 3h-j). While the effect of lorazepam was most  
181 robust at high doses (8 mg/kg), in each xenograft model a significant dose-dependency  
182 was evident with ANOVA post-test for linear contrast. The microenvironment of the brain,  
183 such as the presence of GABAergic neurons, is required for the proliferative effect of  
184 lorazepam, as no effect of lorazepam was observed in H3K27M+ DMG monocultures  
185 (Extended Data Figure 3a). As expected, given the lack of GABA-induced currents in  
186 H3/IDH WT gliomas, lorazepam did not increase glioma proliferation in mice bearing  
187 patient-derived H3/IDH WT pGBM xenografts (Extended Data Figure 4).

188

### 189 **Therapeutic potential of targeting GABAergic neuron-glioma synapses**

190 As neuron-glioma synapses robustly promote glioma cell proliferation and tumor  
191 progression, identifying pharmacological treatments that target these synapses has high  
192 therapeutic potential. Levetiracetam, a generally well-tolerated anti-epileptic drug with  
193 multiple mechanisms of action, reduces GABAergic post-synaptic currents in DMG cells



194 (Figure 4a-b). Strikingly, mice bearing H3K27M+ DMG xenografts treated with  
195 levetiracetam exhibited longer survival than vehicle-treated controls (Figure 4c).  
196 Levetiracetam treatment decreased glioma proliferation in mice bearing H3K27M+ DMG  
197 xenografts compared to vehicle-treated controls, an effect observed in three independent  
198 patient-derived orthotopic xenograft models of H3K27M+ DMG (Figure 4d-f). The effect  
199 of levetiracetam on glioma proliferation is dependent on the brain microenvironment  
200 rather than cell-intrinsic effects, as no effect of levetiracetam was observed in H3K27M+  
201 DMG monocultures (Extended Data Figure 3b).

202 Retrospective, real-world data from two major US pediatric neuro-oncology  
203 centers (Stanford University and University of Michigan) was assessed to query possible  
204 effects of levetiracetam on overall survival in pediatric patients with high-grade gliomas.  
205 Kaplan-Meier analysis of all pHGG patients (n = 216) suggests a survival advantage of  
206 levetiracetam usage (Extended Data Figure 5a). For multivariable survival analysis, we  
207 utilized an elastic net-regularized Cox regression for variable selection and found that in  
208 all patients with high-grade glioma, a diagnosis of DMG was – as expected - associated  
209 with decreased overall survival (coefficient +0.55), and that thalamic DMG tumor location  
210 (coefficient -0.20), and levetiracetam (coefficient -0.11) were associated with increased  
211 overall survival; the variables of age, sex, ONC201 usage, and panobinostat usage had  
212 coefficients of zero. Conventional or targeted chemotherapy other than ONC201 and  
213 panobinostat were surprisingly associated with increased overall survival (coefficient -  
214 0.61), which may be explained by the observation that pontine DMG subjects in the  
215 historical database often did not receive any conventional or targeted therapy (Extended  
216 Data Table 1) due to demonstrated lack of efficacy of conventional chemotherapy in

217 pontine DMG<sup>29</sup>. Hypothesizing that DMGs drove the positive survival association of  
218 levetiracetam usage, we next evaluated DMG and hemispheric HGGs separately. These  
219 databases include subjects with biopsy-demonstrated H3K27M-mutated or H3WT diffuse  
220 midline gliomas as well as subjects prior to availability of molecular testing for whom  
221 diagnosis was based only on the typical radiographic appearance of DMGs; both  
222 H3K27M-altered and H3WT subgroups of DMGs are therefore included (Extended Data  
223 Table 1). The DMG analysis suggests that patients with DMG who had a history of  
224 levetiracetam usage (n = 15 children) exhibited a longer median overall survival (OS)  
225 compared to those without levetiracetam usage (n = 105 children; Extended Data Figure  
226 5b, Extended Data Table 1). Those DMG patients with a history of levetiracetam usage  
227 had a median OS of 20.3 months, compared to those without levetiracetam usage who  
228 exhibited a median OS of 9.2 months (P=0.025). Of note, thalamic DMG represented a  
229 higher proportion of the group with a history of levetiracetam usage than the group with  
230 no history of levetiracetam usage. Comparing subjects with thalamic and pontine DMG  
231 who received levetiracetam, we find no difference in OS in this levetiracetam usage group  
232 (Extended Data Figure 5c), suggesting that the higher proportion of thalamic DMG in this  
233 group does not account for the observed increased median OS compared to the group  
234 without levetiracetam usage. The median OS of the control (no levetiracetam usage)  
235 group is consistent with the expected median OS for DIPG/DMG (10-11 months for  
236 pontine DMG, 13 months for thalamic DMG)<sup>6,7</sup>. Important caveats are that these data are  
237 retrospective, the numbers are small, and levetiracetam should be studied in future  
238 prospective clinical studies with stratification by molecular subtype and DMG location  
239 before drawing conclusions.

240 In contrast to the anti-proliferative effect of levetiracetam on xenografted H3K27M+  
241 DIPG/DMG, levetiracetam treatment did not significantly affect glioma proliferation in mice  
242 bearing patient-derived hemispheric (H3/IDH WT) high-grade glioma xenografts in three  
243 independent models of pediatric and adult hemispheric H3/IDH WT glioblastoma (Figure  
244 4g-i). Concordantly, analysis of the retrospective clinical data focused on hemispheric  
245 pediatric high-grade gliomas revealed no effect of levetiracetam usage on OS in pediatric  
246 patients with non-DMG, hemispheric high-grade gliomas (n=37, median OS 24.6 months  
247 vs n=60 children, median OS 17.0 months with and without levetiracetam use,  
248 respectively, P=0.74, Extended Data Figure 5d, Extended Data Table 2).

249 Phenytoin and ethosuximide, antiepileptic drugs that reduce neuronal  
250 hyperexcitability but do not directly act on known mechanisms of neuron-to-glioma  
251 communication, do not influence DMG proliferation *in vivo* or *in vitro* (Extended Data  
252 Figure 6), highlighting the importance of specifically targeting neuron-to-glioma synapses.

253

## 254 Discussion

255 Glutamatergic neuronal activity has emerged as a powerful regulator of glioma  
256 progression<sup>2-4,25,26,30</sup>. Across multiple clinically and molecularly distinct forms of pediatric  
257 and adult gliomas, activity-regulated paracrine factors such as BDNF and shed neuroligin-  
258 3 promote glioma growth<sup>1,2,25,30</sup>. Similarly, AMPAR-mediated glutamatergic synapses  
259 drive progression in both H3K27M-altered DMG and hemispheric (H3/IDH WT)  
260 glioblastomas<sup>3,4</sup>. Here, we demonstrate that GABAergic interneurons also promote  
261 glioma progression through GABAergic synapses that are depolarizing and growth-  
262 promoting in the specific disease context of diffuse midline gliomas. In contrast, only

263 minimal currents were found in the hemispheric (IDH/H3 WT) high-grade glioma models  
264 used here; it is possible that some subtypes of hemispheric glioma may be found to  
265 respond to GABA heterogenously<sup>31</sup>. We found that the commonly used anti-seizure drug  
266 levetiracetam attenuates these GABAergic currents in diffuse midline gliomas, through  
267 mechanisms that remain to be determined. Levetiracetam has multiple described  
268 mechanisms, including binding to SV2A to decrease presynaptic release, but whether this  
269 represents the mechanism operant in diminishing DMG GABA currents remains to be  
270 tested in future studies. These discoveries highlight the therapeutic potential of re-  
271 purposing levetiracetam to decrease GABAergic signaling in diffuse midline gliomas.

272

273 While this therapeutic potential is supported by the preclinical evidence and suggested  
274 by the retrospective clinical data presented here, it is important to note that prospective  
275 clinical trials are required to validate this effect. In this clinical retrospective study, it may  
276 be that those subjects who developed seizures and therefore received levetiracetam had  
277 tumors that are particularly neurotrophic and thus more susceptible to therapy with  
278 levetiracetam. It is also possible that tumors growing in neuroanatomical locations with  
279 relatively more GABAergic input or different GABA-dependent circuit dynamics are  
280 differentially affected by levetiracetam therapy. An unknown confounder could also be  
281 associated with levetiracetam therapy. Future work, studying larger numbers of patients  
282 and stratifying subjects based on DMG location, molecular characteristics, and glioma  
283 neuroscience correlative markers will be required to draw conclusions about the potential  
284 role of levetiracetam for DMG therapy.

285

286 The anti-seizure drugs tested were growth-inhibitory only if the drug targeted specific  
287 mechanisms of neuron-glioma interaction in that tumor type. Ethosuximide and phenytoin  
288 do not target known mechanisms of neuron-glioma interactions and did not affect tumor  
289 proliferation in the preclinical models used here. Similarly, neither levetiracetam nor  
290 lorazepam influenced the proliferation of the three independent hemispheric (H3/IDH WT)  
291 glioblastoma models used here. Past clinical studies of antiepileptic drug effects in adult  
292 high-grade glioma have not been guided by knowledge of drugs that specifically target  
293 neurophysiological mechanisms operant in that tumor type. Not surprisingly, the results  
294 of such anti-seizure medication studies have been mixed. Levetiracetam used  
295 concomitantly with chemoradiation has been reported to improve outcomes in  
296 hemispheric, H3/IDH WT glioblastoma in some studies <sup>32</sup>, while large meta-analyses have  
297 found no discernable effect on outcome in others <sup>33,34</sup>. These discordant findings in the  
298 literature may reflect the heterogeneity inherent in hemispheric H3/IDH WT high-grade  
299 gliomas<sup>34</sup>, and specific subgroups of H3/IDH WT glioblastoma yet-to-be determined could  
300 be responsive to levetiracetam. Here, we found no effect of levetiracetam in three  
301 independent preclinical models of pediatric and adult hemispheric (H3/IDH WT) high-  
302 grade glioma and no effect of levetiracetam in retrospective analyses of pediatric patients  
303 with non-DMG, hemispheric high-grade gliomas.

304

305 In DMGs, the risk to benefit ratio of benzodiazepines should be carefully considered.  
306 Benzodiazepines, which potentiate signaling through GABA<sub>A</sub> receptors, promote glioma  
307 GABAergic currents and tumor proliferation in the H3K27M-altered DMG models used  
308 here. Benzodiazepines are commonly used in children with DMG for nausea, anxiety,

309 claustrophobia during MRI scans and other medical procedures, and for other reasons.  
310 While benzodiazepines are important medications for palliative care, use should be  
311 carefully considered in DMG outside of the context of end-of-life care and should be  
312 further evaluated in clinical analyses. Conversely, and further underscoring differences  
313 between DMG and hemispheric high-grade gliomas, preclinical studies indicate that  
314 GABA and GABAergic interneurons may instead be growth-inhibitory hemispheric  
315 (H3/IDH WT) adult glioblastoma models<sup>35,36</sup>. These findings underscore the therapeutic  
316 importance of elucidating the neurophysiology of defined subtypes of brain cancers to  
317 identify the patient populations for which a particular neurophysiological drug may be  
318 beneficial or detrimental. Understanding the neuroscience of brain tumors will enable the  
319 development of effective and safe therapeutic approaches, incorporating neuroscience-  
320 informed therapies into combinatorial strategies targeting both cell-intrinsic and  
321 microenvironmental mechanisms that drive progression of these devastating cancers.

322

## 323 **Methods**

### 324 **Human samples and data**

325 For all human tissue and cell studies, informed consent was obtained, and tissue was  
326 used in accordance with protocols approved by the Stanford University Institutional  
327 Review Board (IRB). IRB approval was also obtained for retrospective analyses of real-  
328 world clinical data kept in IRB-approved databases at Stanford University and University  
329 Michigan.

330

### 331 **Mice and housing conditions**

332 All *in vivo* experiments were conducted in accordance with protocols approved by the  
333 Stanford University Institutional Animal Care and Use Committee (IACUC) and performed  
334 in accordance with institutional guidelines. Animals were housed according to standard  
335 guidelines with free access to food and water in a 12 h light:12 h dark cycle. For brain  
336 tumor xenograft experiments, the IACUC does not set a limit on maximal tumor volume  
337 but rather on indications of morbidity. In no experiments were these limits exceeded as  
338 mice were euthanized if they exhibited signs of neurological morbidity or if they lost 15%  
339 or more of their body weight.

340

#### 341 **Orthotopic xenografting**

342 For all xenograft studies, NSG mice (NOD-SCID-IL2R gamma chain-deficient, The  
343 Jackson Laboratory) were used. Male and female mice were used equally. A single-cell  
344 suspension from cultured SU-DIPG-VI-GFP, SU-DIPG-XIII-FL-GFP, SU-DIPG-50-GFP,  
345 SU-pcGBM2-GFP, SF0232, or SF0238 neurospheres were prepared in sterile PBS  
346 immediately before the xenograft procedure. Animals at postnatal day (P) 28–30 were  
347 anaesthetized with 1–4% isoflurane and placed in a stereotactic apparatus. The cranium  
348 was exposed via midline incision under aseptic conditions. Approximately 300,000 cells  
349 in 3  $\mu$ l sterile PBS were stereotactically implanted through a 26-gauge burr hole, using a  
350 digital pump at infusion rate of 0.4  $\mu$ l  $\text{min}^{-1}$  and 26-gauge Hamilton syringe. For all  
351 electrophysiology and optogenetics experiments, cells were implanted into the CA1  
352 region of the hippocampus (1.5 mm lateral to midline, -1.8 mm posterior to bregma, -1.4  
353 mm deep to cranial surface). SU-DIPG-XIII-FL-GFP for lorazepam and levetiracetam  
354 treatments were xenografted into the premotor cortex (0.5 mm lateral to midline, 1.0 mm

355 anterior to bregma, -1.75 mm deep to cranial surface). SU-DIPG-XIII-P for survival study  
356 and SU-DIPG-VI-GFP and SU-DIPG-50-GFP for lorazepam, levetiracetam,  
357 ethosuximide, and phenytoin treatments were xenografted into the pons (1.0 mm lateral  
358 to midline, -0.8 mm posterior to lambda, -5.0 mm deep to cranial surface). At the  
359 completion of infusion, the syringe needle was allowed to remain in place for a minimum  
360 of 2 min, then manually withdrawn at a rate of 0.875 mm min<sup>-1</sup> to minimize backflow of  
361 the injected cell suspension.

362

### 363 **Patient-derived cell culture**

364 All high-grade glioma cultures were generated as previously described <sup>11</sup>. In brief, tissue  
365 was obtained from high-grade glioma (WHO (World Health Organization) grade III or IV)  
366 tumors at the time of biopsy or from early post-mortem donations. Tissue was dissociated  
367 both mechanically and enzymatically and grown in a defined, serum-free medium  
368 designated 'tumor stem media' (TSM), consisting of neurobasal(-A) (Invitrogen), B27(-A)  
369 (Invitrogen), human bFGF (20 ng ml<sup>-1</sup>; Shenandoah), human EGF (20 ng ml<sup>-1</sup>;  
370 Shenandoah), human PDGF-AA (10 ng ml<sup>-1</sup>) and PDGF-BB (10 ng ml<sup>-1</sup>; Shenandoah)  
371 and heparin (2 ng ml<sup>-1</sup>; Stem Cell Technologies). For all patient-derived cultures,  
372 mycoplasma testing was routinely performed, and short tandem repeat DNA fingerprinting  
373 was performed every three months to verify authenticity. The short tandem repeat  
374 fingerprints and clinical characteristics for the patient-derived cultures and xenograft  
375 models used have been previously reported <sup>37</sup>.

376

### 377 **Single-cell sequencing analysis**



378 We combined publicly available single-cell datasets processed and annotated  
379 previously<sup>13,38</sup>, all sequenced using smart-seq2 protocol. Following the quality-control  
380 measures taken in these studies, we filtered the data to keep cells with more than 400  
381 detected genes, and genes that were expressed in more than 3 cells. We assessed the  
382 single-cell transcriptome from 6,341 adult IDH-mutant glioma cells derived from biopsies  
383 from 10 study participants, 599 adult wild-type IDH glioma cells derived from biopsies  
384 from 3 study participants, and 2,458 pediatric H3K27M DMG cells derived from biopsies  
385 from 6 study participants, as well as the single-cell transcriptome of patient-derived SU-  
386 DIPGVI and SU-DIPGXIII-FL cells. Malignant cells were inferred by expression programs  
387 and detection of tumor-specific genetic alterations. For each sample, we performed first  
388 cell-level normalization, and then centered the gene expression around 0 to allow  
389 principal component analysis (PCA) computation. Following the PCA reduction, we  
390 clustered the cells using shared nearest neighbor clustering. To examine the various  
391 GABA<sub>A</sub> receptor signatures of each of the cells in each cluster, we used the function  
392 AddModuleScore by Seurat package, which calculates the average expression levels of  
393 the gene set subtracted by the aggregated expression of 100 randomly chosen control  
394 gene sets, where the control gene sets are chosen from matching 25 expression bins  
395 corresponding to the tested gene set expression. The gene sets used are as followed:  
396 GABA<sub>A</sub> receptor  $\alpha$ : GABRA1, GABRA2, GABRA3, GABRA4, GABRA5, GABRA6; GABA<sub>A</sub>  
397 receptor  $\beta$ : GABRB1, GABRB2, GABRB3; total GABA<sub>A</sub> receptor: GABRA1, GABRA2,  
398 GABRA3, GABRA4, GABRA5, GABRA6, GABRB1, GABRB2, GABRB3, GABRG1,  
399 GABRG2, GABRG3, GABRD, GABRE, GABRP, GABRQ, GABRR1, GABRR2,  
400 GABRR3.

401

## 402 **Slice preparation for electrophysiology**

403 Coronal slices (300  $\mu\text{m}$  thick) containing the hippocampal region were prepared from mice  
404 (at least 8 weeks after xenografting) in accordance with a protocol approved by Stanford  
405 University IACUC. After rapid decapitation, the brain was removed from the skull and  
406 immersed in ice-cold slicing artificial cerebrospinal fluid (ACSF) containing (in mM): 125  
407 NaCl, 2.5 KCl, 25 glucose, 25  $\text{NaHCO}_3$  and 1.25  $\text{NaH}_2\text{PO}_4$ , 3  $\text{MgCl}_2$  and 0.1  $\text{CaCl}_2$ . After  
408 cutting, slices were incubated for 30 min in warm (30  $^\circ\text{C}$ ) oxygenated (95%  $\text{O}_2$ , 5%  $\text{CO}_2$ )  
409 recovery ACSF containing (in mM): 100 NaCl, 2.5 KCl, 25 glucose, 25  $\text{NaHCO}_3$ , 1.25  
410  $\text{NaH}_2\text{PO}_4$ , 30 sucrose, 2  $\text{MgCl}_2$  and 1  $\text{CaCl}_2$  before being allowed to equilibrate at room  
411 temperature for an additional 30 min.

412

## 413 **Electrophysiology**

414 Slices were transferred to a recording chamber and perfused with oxygenated, warmed  
415 (28–30  $^\circ\text{C}$ ) recording ACSF containing (in mM): 125 NaCl, 2.5 KCl, 25 glucose, 25  
416  $\text{NaHCO}_3$ , 1.25  $\text{NaH}_2\text{PO}_4$ , 1  $\text{MgCl}_2$  and 2  $\text{CaCl}_2$ . NBQX (10  $\mu\text{M}$ ) was perfused with the  
417 recording ACSF to prevent AMPA receptor-mediated currents in synaptic response  
418 experiments. TTX (0.5  $\mu\text{M}$ ) was perfused with the recording ACSF to prevent neuronal  
419 action potential firing in GABA puff experiments. Slices were visualized using a  
420 microscope equipped with DIC optics (Olympus BX51WI). Recording patch pipettes (3-5  
421  $\text{M}\Omega$ ) were filled with CsCl-based pipette solution containing (in mM): 150 CsCl, 5 EGTA,  
422 1  $\text{MgCl}_2$ , 10 HEPES, 2 ATP, 0.3 GTP, pH = 7.3. Pipette solution additionally contained  
423 Alexa 568 (50  $\mu\text{M}$ ) to visualize the cell through dye-filling during whole-cell recordings.

424 Gramicidin A (60  $\mu\text{g}/\text{mL}$ ) was added to the pipette solution for perforated patch  
425 recordings. Glioma cells were voltage-clamped at  $-70$  mV. Synaptic responses were  
426 evoked with a bipolar electrode connected to an Iso-flex stimulus isolator (A.M.P.I.)  
427 placed near the xenografted cells. GABA (1 mM) in recording ACSF was applied via a  
428 puff pipette, which was placed approximately 100  $\mu\text{m}$  away from the patched cell and  
429 controlled by a Picospritzer II (Parker Hannifin Corp.). Optogenetic currents were evoked  
430 with a 598 nm LED using a pE-4000 illumination system (CoolLED). Signals were  
431 acquired with a MultiClamp 700B amplifier (Molecular Devices) and digitized at 10 kHz  
432 with an InstruTECH LIH 8+8 data acquisition device (HEKA). Data were recorded and  
433 analyzed using AxoGraph X (AxoGraph Scientific) and IGOR Pro 8 (Wavemetrics). For  
434 representative traces, stimulus artifacts preceding the synaptic currents have been  
435 removed for clarity. Intracellular chloride concentration was calculated using the Nernst  
436 equation.

437

### 438 **Inhibitors**

439 Drugs and toxins used for electrophysiology were picrotoxin (50  $\mu\text{M}$ ; Tocris), TTX (0.5  
440  $\mu\text{M}$ ; Tocris), NBQX (10  $\mu\text{M}$ ; Tocris), bumetanide (100  $\mu\text{M}$ ), lorazepam (10  $\mu\text{M}$ ; Hospira),  
441 and levetiracetam (100  $\mu\text{M}$ ; Selleck Chemicals). When used for *in vitro* slice application,  
442 drugs were made up as a stock in distilled water or dimethylsulfoxide (DMSO) and  
443 dissolved to their final concentrations in ACSF before exposure to slices.

444

### 445 **Viral injection and fibre optic placement**

446 Animals were anesthetized with 1-4% isoflurane and placed in a stereotaxic apparatus.  
447 For optogenetic stimulation experiments, 1  $\mu$ l of AAV8-Dlx5/6-ChRmine::oScarlet (virus  
448 titer=  $1.19 \times 10^{12}$ ) (a gift from Dr. Karl Deisseroth from Stanford University; Chen et al.,  
449 2020, Nature Biotech) was unilaterally injected using Hamilton Neurosyringe and  
450 Stoelting stereotaxic injector over 5 minutes. The viral vector was injected into  
451 hippocampus CA1 in the right hemisphere at coordinates: 1.5 mm lateral to midline, -1.8  
452 mm posterior to bregma, -1.3 mm deep to cranial surface. 2 weeks following the viral  
453 injection, SU-DIPG-XIII-FL cells were xenografted as described above. After 7 weeks of  
454 tumor engraftment, an optic ferrule was placed above the CA1 of the hippocampus of the  
455 right hemisphere, at 1.5 mm lateral to midline, -1.8 mm posterior to bregma, -1.25 mm  
456 deep to cranial surface.

457

### 458 **Optogenetic stimulation**

459 Optogenetic stimulations were performed at least 10 weeks after the viral vector delivery,  
460 8 weeks after xenografts, and 1 week after optic ferrule implantation. Freely moving  
461 animals were connected to a 595 nm fiber-coupled LED laser system with a monofiber  
462 patch cord. Optogenetic stimulation was performed with cycles of 595 nm light pulses at  
463 40 Hz frequency, 10 ms width, and a light power output of 10-15mW from the tip of the  
464 optic fiber, which lasted for 30 seconds, followed by 90 seconds recovery over a 30-  
465 minute period. Animals were injected intraperitoneally with 40 mg/kg EdU (5-ethynyl-2'-  
466 deoxyuridine; Invitrogen, E10187) before the session, and were perfused 24 hours after  
467 the optogenetic stimulations.

468

## 469 **Bioluminescence imaging**

470 For in vivo monitoring of tumor growth, bioluminescence imaging was performed using  
471 an IVIS imaging system (Xenogen). Mice orthotopically xenografted with luciferase-  
472 expressing glioma cells were placed under isoflurane anesthesia and injected with  
473 luciferin substrate. Animals were imaged at baseline and randomized based on tumor  
474 size by a blinded investigator so that experimental groups contained an equivalent range  
475 of tumor sizes. Over the course of each study (described below), all total flux values were  
476 then normalized to baseline values to determine fold change of tumor growth.

477

## 478 **Mouse drug treatment studies**

479 For all drug studies, NSG mice were xenografted as above with SU-DIPG-VI-GFP, SU-  
480 DIPG-XIII-FL-GFP, SU-DIPG-50-GFP, SU-pcGBM2-GFP, SF0232, or SF0238 cells and  
481 randomized to treatment group by a blinded investigator. Four to six weeks post-  
482 xenograft, mice were treated with systemic administration of lorazepam (8 mg kg<sup>-1</sup> or 2  
483 mg kg<sup>-1</sup>; Hospira), levetiracetam (20 mg kg<sup>-1</sup>; Selleck Chemicals), or phenytoin (50 mg  
484 kg<sup>-1</sup>; Selleck Chemicals) via intraperitoneal injection, or ethosuximide (300 mg kg<sup>-1</sup>;  
485 Selleck Chemicals) via oral gavage for four weeks (5 days per week). For all studies,  
486 controls were treated with an identical volume of the relevant vehicle. Bioluminescence  
487 imaging was performed before treatment and every 7 days thereafter using an IVIS  
488 imaging system (Xenogen) under isoflurane anesthesia. Tumor burden was assessed as  
489 fold change in total flux from the beginning to end of treatment.

490

## 491 **Xenograft survival studies**

492 For survival studies, morbidity criteria used were either reduction of weight by 15% initial  
493 weight, or severe neurological motor deficits consistent with brainstem dysfunction (that  
494 is, hemiplegia or an incessant stereotyped circling behavior seen with ventral midbrain  
495 dysfunction). Kaplan–Meier survival analysis using log rank testing was performed to  
496 determine statistical significance.

497

### 498 **Perfusion and immunohistochemistry**

499 Animals were anaesthetized with intraperitoneal avertin (tribromoethanol), then  
500 transcardially perfused with 20 ml of PBS. Brains were fixed in 4% PFA overnight at 4 °C,  
501 then transferred to 30% sucrose for cryoprotection. Brains were then embedded in  
502 Tissue-Tek O.C.T. (Sakura) and sectioned in the coronal plane at 40 µm using a sliding  
503 microtome (Microm HM450; Thermo Scientific).

504

505 For immunohistochemistry, coronal sections were incubated in blocking solution (3%  
506 normal donkey serum, 0.3% Triton X-100 in TBS) at room temperature for 2 hours.  
507 Chicken anti-GFP (1:500, Abcam), mouse anti-human nuclei clone 235-1(1:100;  
508 Millipore), or rabbit anti-Ki67 (1:500; Abcam) were diluted in antibody diluent solution (1%  
509 normal donkey serum in 0.3% Triton X-100 in TBS) and incubated overnight at 4 °C.  
510 Sections were then rinsed three times in TBS and incubated in secondary antibody  
511 solution containing Alexa 488 donkey anti-chicken IgG, Alexa 594 donkey anti-rabbit IgG,  
512 or Alexa 647 donkey anti-mouse IgG used at 1:500 (Jackson Immuno Research) in  
513 antibody diluent at 4 °C overnight. Sections were rinsed three times in TBS and mounted  
514 with ProLong Gold Mounting medium (Life Technologies).

515

## 516 **Confocal imaging and quantification of cell proliferation**

517 Cell quantification within xenografts was performed by a blinded investigator using live  
518 counting on a 40× oil immersion objective or 20× air objective of a Zeiss LSM700 or Zeiss  
519 LSM800 scanning confocal microscope and Zen imaging software (Carl Zeiss). For Ki67  
520 analysis, 3 fields for quantification were selected from each of 3 consecutive sections in  
521 a 1-in-6 series of 40-μm coronal sections with respect to overall tumor burden. Within  
522 each field, all HNA-positive and GFP-positive tumor cells were quantified to determine  
523 tumor burden within the areas quantified. HNA-positive were then assessed for co-  
524 labelling with Ki67. To calculate the proliferation index (the percentage of proliferating  
525 tumor cells for each mouse), the total number of HNA-positive cells co-labelled with Ki67  
526 across all areas quantified was divided by the total number of cells counted across all  
527 areas quantified (Ki67+/HNA+).

528

## 529 **EdU Incorporation Assay**

530 Diffuse intrinsic pontine glioma (DIPG) tumor neurosphere cultures SU-DIPGVI, SU-  
531 DIPGXIII, and SU-DIPG50 were generated as previously described<sup>3,7</sup> from early post-  
532 mortem tissue donations and grown as tumor neurospheres in defined, serum-free ‘tumor  
533 stem media’ (TSM) media, consisting of 1:1 mixture of neurobasal(-A) (Invitrogen) and D-  
534 MEM/F-12 (Invitrogen), HEPES buffer (Invitrogen), MEM sodium pyruvate (Invitrogen),  
535 MEM non-essential amino acids (Invitrogen), GlutaMAX-1 supplement (Invitrogen), B27(-  
536 A) (Invitrogen), human bFGF (20 ng/ml; Shenandoah), human EGF (20 ng/ml;

537 Shenandoah), human PDGF-AA (10 ng/ml) and PDGF-BB (10 ng/ml; Shenandoah) and  
538 heparin (2 ng/ml; Stem Cell Technologies).

539

540 100,000 glioma cells were plated onto circular glass coverslips (Electron Microscopy  
541 Services) pre-treated for 1 h at 37 °C with poly-L-lysine (Sigma) and then 1 h at 37 °C  
542 with 10 µg/ml natural mouse laminin (Thermo Fisher). Dimethyl sulfoxide (Sigma-Aldrich)  
543 or drugs at the concentrations indicated (dissolved in dimethyl sulfoxide) were added to  
544 the coverslips. 10 µM EdU was added to each coverslip. Cells were fixed after 24 hr using  
545 4% paraformaldehyde in PBS and stained using the Click-iT EdU kit and protocol  
546 (Invitrogen). Proliferation index was then determined by quantifying the fraction of EdU  
547 labeled cells/DAPI labeled cells using confocal microscopy.

548

#### 549 **Retrospective, real-world patient data**

550 Retrospective data on patients with high-grade glial tumors were collected from patient  
551 databases at Stanford University (1990-2020) and the University of Michigan (2012-2021)  
552 through protocols approved by the respective institutional review boards. Database  
553 source data for pediatric high-grade glioma patients were reviewed for this study to  
554 ensure veracity and completeness. Overall survival was calculated using the Kaplan-  
555 Meier estimator; the log-rank test was utilized to compare survival distributions. Patients  
556 were censored at time of last contact for the Kaplan-Meier analysis. Given the number of  
557 potential parameters with high correlation, an elastic net-regularized regression was  
558 utilized for covariate selection in a multivariable survival model. Clinical data including  
559 age; sex; tumor location; diagnosis of DMG; and administration of ONC201, panobinostat,



560 conventional chemotherapy, and levetiracetam were considered potential covariates.  
561 Twenty-fold cross-validation was used to obtain the value of  $\lambda$  that gave the minimum  
562 mean cross-validated error; corresponding coefficients for each variable were  
563 subsequently determined. All data were compiled and analyzed in R version 4.0 or  
564 higher.

565

### 566 **Statistical analyses**

567 Statistical tests were conducted using Prism (GraphPad) software unless otherwise  
568 indicated. Gaussian distribution was confirmed by the Shapiro–Wilk normality test. For  
569 parametric data, unpaired two-tailed Student’s t-tests or one-way ANOVA with Tukey’s  
570 post hoc tests to examine pairwise differences were used as indicated. Paired two-tailed  
571 Student’s t-tests were used in the case of same cell experiments (as in  
572 electrophysiological recordings). For non-parametric data, a two-sided unpaired Mann–  
573 Whitney test was used as indicated, or a one-tailed Wilcoxon matched-pairs signed rank  
574 test was used in the case of same-cell experiments. Two-tailed log rank analyses were  
575 used to analyze statistical significance of Kaplan–Meier survival curves. A level of  $P <$   
576  $0.05$  was used to designate significant differences. Based on the variance of xenograft  
577 growth in control mice, we used at least three mice per genotype to give 80% power to  
578 detect an effect size of 20% with a significance level of 0.05. For all mouse experiments,  
579 the number of independent mice used is listed in figure legend. Statistical analyses of  
580 retrospective patient data are described above.

581

### 582 **Data availability**

583 All data are available in the manuscript or from the corresponding author upon reasonable  
584 request. Source data will be uploaded with the final version of the manuscript.

585

586 **Code availability**

587 Sources for all code used have been provided, no custom code was created for this  
588 manuscript.

589

590 **Acknowledgements:** This work was supported by grants from Cancer Research UK (to  
591 M.M.), ChadTough Defeat DIPG (to M.M. and T.B.), the National Institute of  
592 Neurological Disorders and Stroke (R01NS092597 to M.M.), NIH Director's Pioneer  
593 Award (DP1NS111132 to M.M.), National Cancer Institute (P50CA165962,  
594 R01CA258384, U19CA264504 to M.M.), Robert J. Kleberg, Jr. and Helen C. Kleberg  
595 Foundation (to M.M.), McKenna Claire Foundation (to M.M.), Kyle O'Connell Foundation  
596 (to M.M.), Virginia and D.K. Ludwig Fund for Cancer Research (to M.M.), Waxman  
597 Family Research Fund (to M.M.), Will Irwin Research Fund (to M.M.). The authors thank  
598 Shawn Hervey-Jumper for the gift of IDH WT adult GBM SF0232 and SF0238 cells.

599

600 **Author contributions:** M.M. and T.B. designed the experiments and wrote the  
601 manuscript. T.B., B.Y., K.S. V.M., S.M.J., K.R.T, M.B.K., H.X., M.S., M.A.Q., and P.J.W  
602 conducted experiments and performed data analyses. P.G.F., S.P., C.J.C., A.M., C.K.,  
603 D.L. maintained patient databases at Stanford and University of Michigan; A.M., E.C.,  
604 A.F., S.L., abstracted data from the databases; D.T. and C.K. reviewed source data for  
605 all pediatric high-grade glioma database entries to ensure veracity and completeness.

606 All authors contributed to manuscript editing. M.M. conceived the project and  
607 supervised all aspects of the work.

608

609 **Author declarations:** M.M. holds equity in MapLight Therapeutics and Syncopation  
610 Life Sciences.

611

612

613

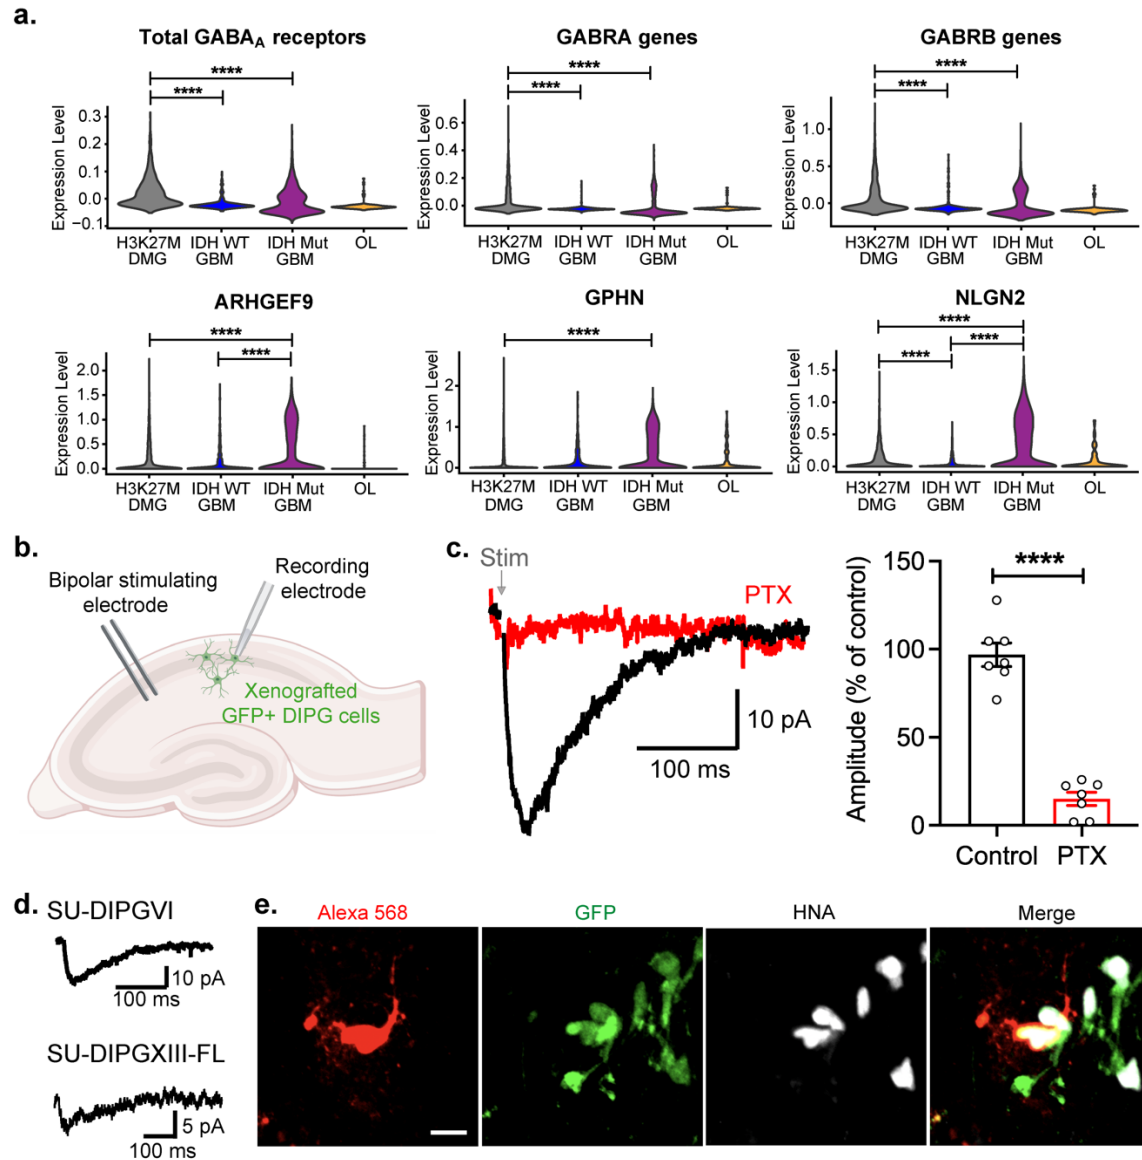

614

615 **Figure 1. GABAergic neuron-glioma synapses.**

616 **a.** Single cell RNAseq analysis of primary human biopsies of H3K27M diffuse midline  
 617 glioma (grey; n = 2,259 cells, 6 study participants), IDH wild-type (WT) high-grade glioma  
 618 (blue; n = 599 cells, 3 participants), IDH mutant (mut) high-grade glioma (purple; n = 5,096  
 619 cells, 10 participants) malignant cells, and tumor-associated, non-malignant  
 620 oligodendrocytes (OL, yellow; n = 232 cells), demonstrating expression of total GABA<sub>A</sub>  
 621 receptor subunit genes,  $\alpha$  subunit genes,  $\beta$  subunit genes, and postsynaptic genes

622 specific to GABAergic synapses. Statistical analyses performed on single cells are  
623 represented with stars only when also significant when analyzed on a per patient basis  
624 as well as a per cell basis. Comparisons to OL (control cell type) are not shown.

625 **b.** Patient-derived DMG cells expressing GFP were xenografted into the CA1 region of  
626 the hippocampus of NSG mice. Response to local CA1 stimulation via a bipolar stimulator  
627 was recorded in xenografted cells using whole-cell patch clamp electrophysiology.

628 **c.** Representative trace of picrotoxin (PTX)-sensitive GABAergic postsynaptic current  
629 (PSC) in a DMG cell (left). Quantification of current amplitude after 50  $\mu$ M PTX as a % of  
630 control (right; n = 7 cells from 5 mice). Recording performed in the presence of NBQX to  
631 block AMPAR currents.

632 **d.** Representative traces of GABAergic PSCs in two xenografted DMG cell lines.

633 **e.** Confocal image of a xenografted DMG cell dye-filled (Alexa 568; red) during recording  
634 and co-labelled with GFP (green) and HNA (white) post-recording. Scale bar, 10  $\mu$ m. All  
635 data are mean  $\pm$  s.e.m. \*\*\*\*P < 0.0001, paired Student's t-test.

636

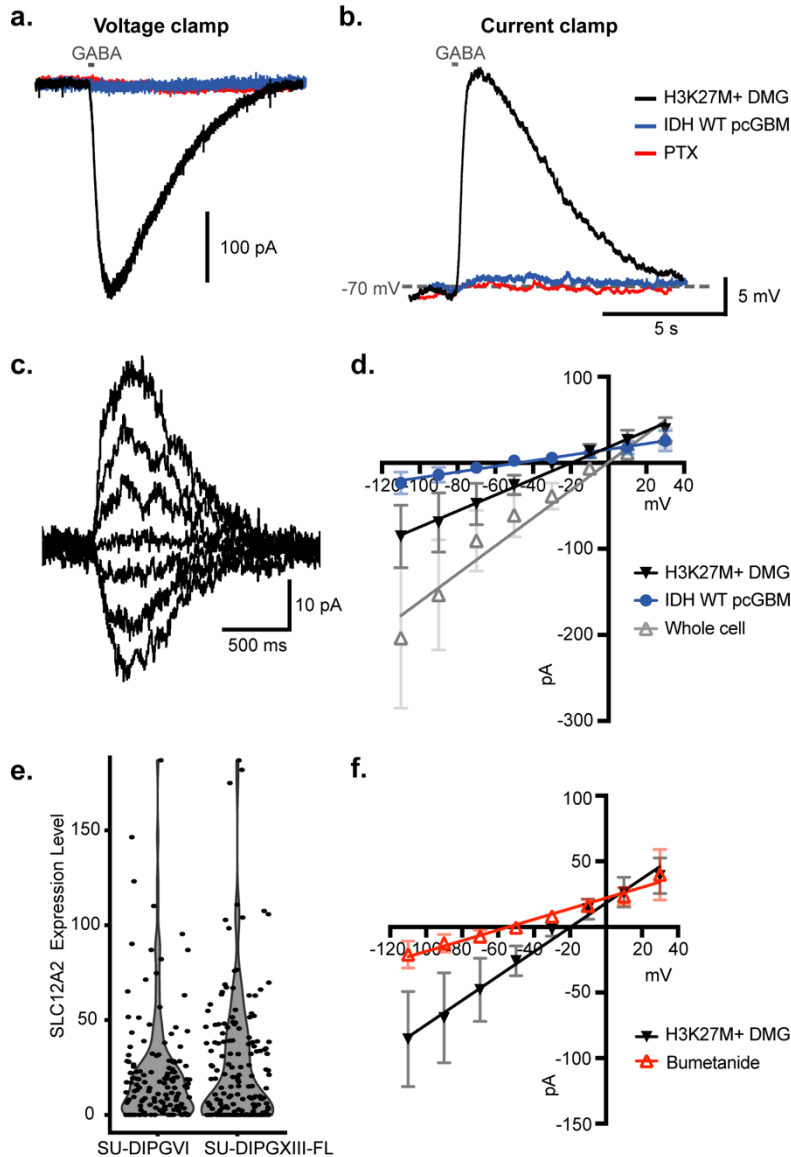

637

638

**Figure 2. GABA is depolarizing in DMG, but not IDH wild type glioblastoma.**

639

**a-b.** Perforated patch of xenografted patient-derived H3K27M+ DMG cells and hemispheric (IDH/H3 WT) pediatric cortical glioblastoma (pcGBM) reveals varying current sizes (in voltage clamp, **a.**) and levels of depolarization (in current clamp, **b.**) in response to local GABA application.

643

**c.** Representative trace of H3K27M+ DMG cell response to GABA at varying membrane potentials.

644

645 **d.** Current-voltage relationship of GABA current in DMG cells and IDH WT pcGBM cells  
646 recorded with perforated patch and whole-cell patch clamp electrophysiology. Reversal  
647 potential of GABA was -19.61 mV in H3K27M+ DMG cells (n = 6 cells from 5 mice), -  
648 47.44 mV in IDH WT pcGBM cells (n = 6 cells from 5 mice), and -0.4051 mV during whole-  
649 cell recording of H3K27M+ DMG cells with a high Cl<sup>-</sup> internal solution (n = 4 cells from 4  
650 mice).

651 **e.** Single cell RNAseq analysis of SLC12A2 (NKCC1) in patient-derived DMG xenografts.

652 **f.** Current-voltage relationship of H3K27M+ DMG cells in the presence of 100 μM  
653 bumetanide, a NKCC1 inhibitor. Reversal potential of GABA in DMG cells is -54.20 mV  
654 in the presence of bumetanide (n = 5 cells from 3 mice). All data are mean ± s.e.m.

655

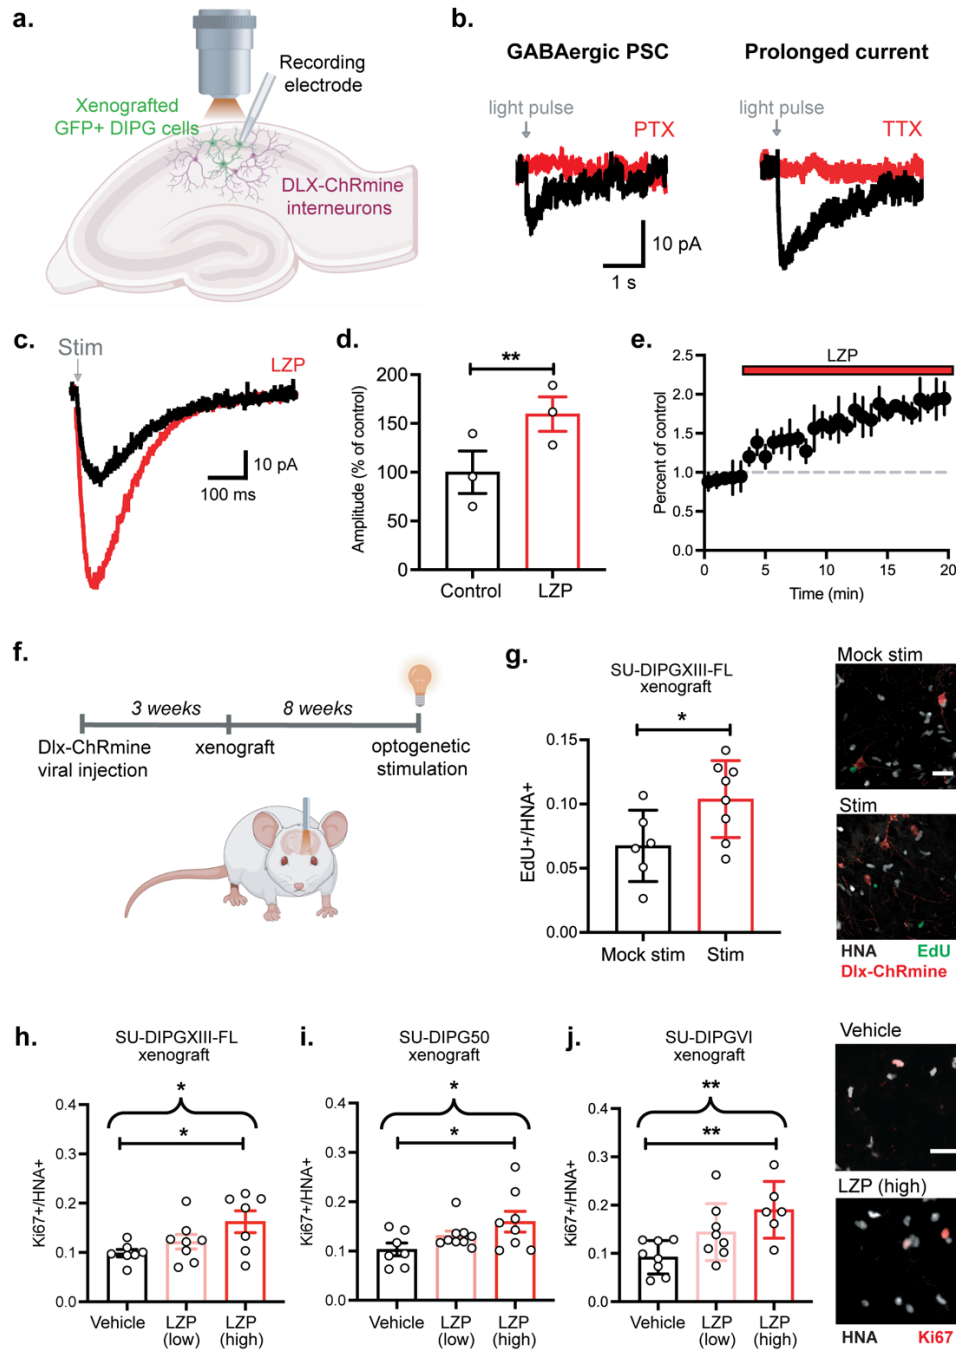

656

657 **Figure 3. GABAergic interneuron activity drives DMG proliferation.**

658 **a.** Patient-derived DMG cells expressing GFP were xenografted into the CA1 region of  
 659 the hippocampus of NSG mice. Response to optogenetic stimulation of GABAergic



660 interneurons expressing DLX-ChRmine was recorded in xenografted cells using patch  
661 clamp electrophysiology.

662 **b.** Two types of responses to optogenetic stimulation of GABAergic neurons were  
663 recorded in DMG cells: a PTX-sensitive GABAergic PSC (top) and a prolonged  
664 tetrodotoxin (TTX)-sensitive current (bottom).

665 **c.** Representative trace of GABAergic PSCs in DMG in the absence and presence of 10  
666  $\mu$ M lorazepam (LZP), a benzodiazepine.

667 **d.** Quantification of current amplitude after LZP perfusion as a % of control (n = 3 cells  
668 from 3 mice), paired Student's t-test.

669 **e.** Time course of GABAergic PSC decrease in response to LZP.

670 **f.** Experimental paradigm for *in vivo* optogenetic stimulation of DLX-ChRmine  
671 interneurons near xenografted DMG cells in the CA1 region of the hippocampus.

672 **g.** Quantification of proliferation index (EdU+/HNA+ cells) after optogenetic stimulation or  
673 mock stimulation (left; mock stim, n = 6 mice; stim, n = 8 mice, two-tailed Student's t-test).

674 Right, representative confocal images of DLX-ChRmine GABAergic interneurons (red)  
675 near xenografted DMG cells expressing EdU (green) and HNA (white). Scale bar, 25  $\mu$ m.

676 **h-j.** Dose-dependent (low = 2 mg/kg; high = 8 mg/kg) effect of LZP treatment in mice with  
677 patient-derived DMG xenografts, SU-DIPGXIII-FL (vehicle, n = 7 mice; low dose, n = 8

678 mice; high dose, n = 7 mice; **h**), SU-DIPG50 (vehicle, n = 7 mice; low dose, n = 9 mice;

679 high dose, n = 8 mice; **i**), and SU-DIPGVI (vehicle, n = 8 mice; low dose, n = 8 mice; high

680 dose, n = 6 mice; **j**), one-way ANOVA. Straight brackets indicate Dunnett's multiple

681 comparisons test between two groups; curved brackets indicate post-test for linear

682 contrast among all three groups. Right, representative confocal images of xenografted

683 SU-DIPGVI cells expressing Ki67 (red) and HNA (white). Scale bar, 25  $\mu$ m. All data are

684 mean  $\pm$  s.e.m. \*P < 0.05, \*\*P < 0.01.

685

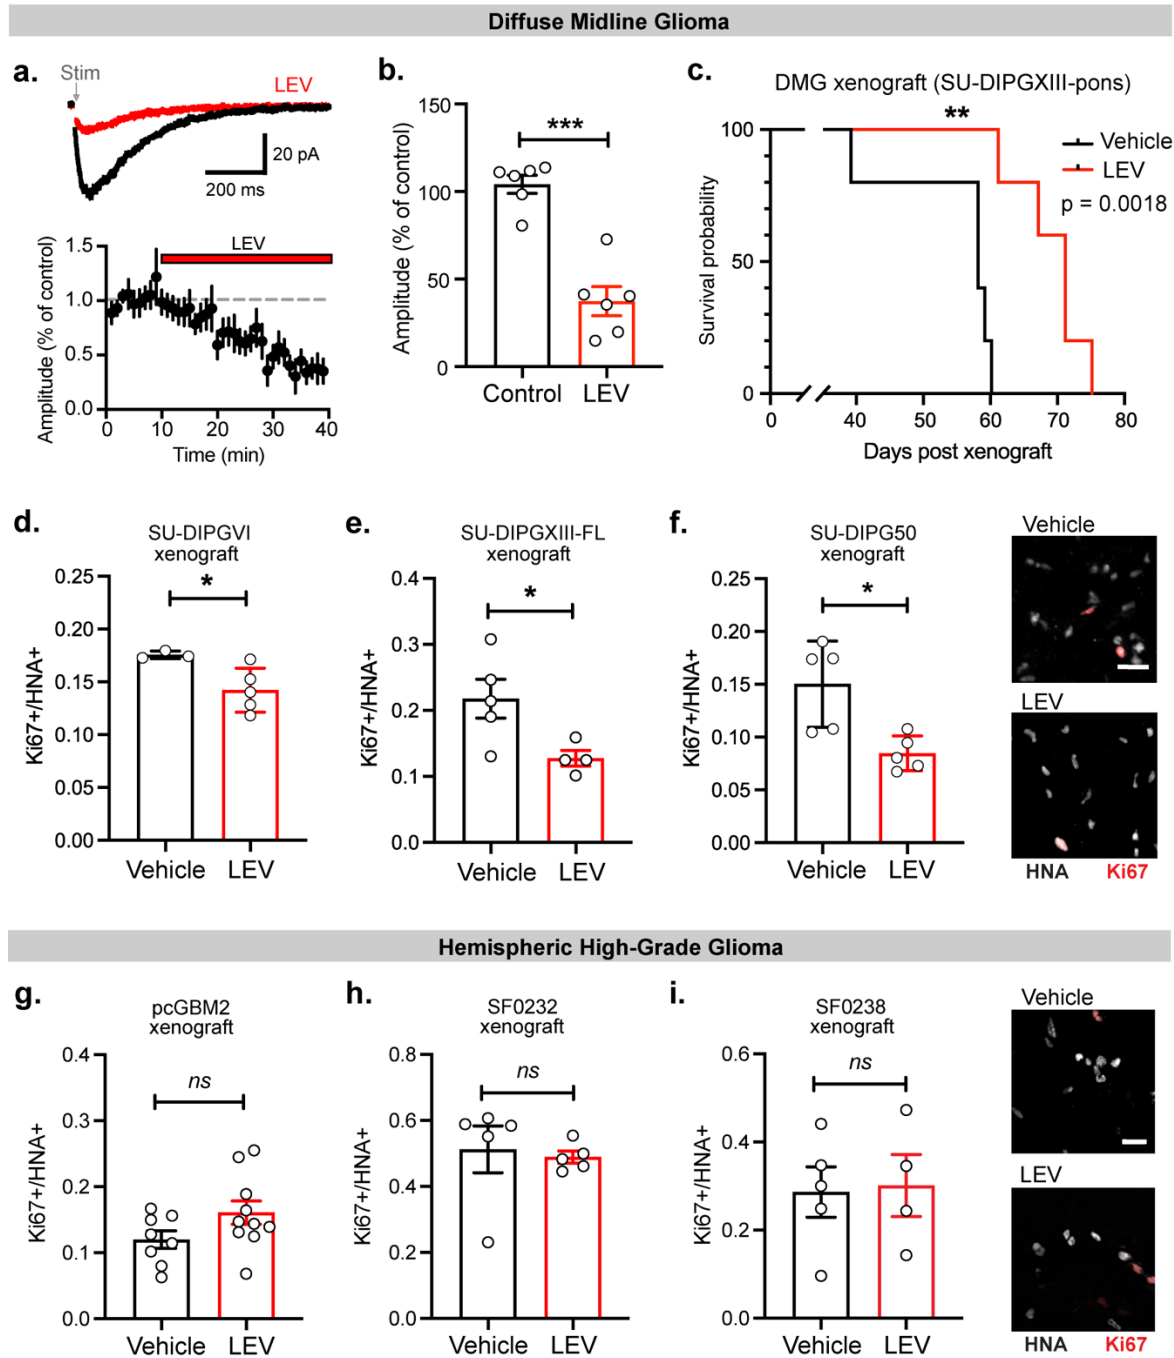

686

687 **Figure 4. Targeting neuron-to-glioma synapses reduces tumor progression in**

688 **DMG.**

689 **a.** Representative trace of GABAergic PSCs in DMG in the absence and presence of 100  
690  $\mu$ M levetiracetam (LEV), an anti-epileptic drug. Below, time course of GABAergic PSC  
691 decrease in response to LEV.

692 **b.** Quantification of current amplitude after LEV perfusion as a % of control (n = 6 cells  
693 from 5 mice), paired Student's t-test.

694 **c.** Kaplan–Meier survival curves of mice with xenografted SU-DIPG-XIII-P tumors treated  
695 with LEV or vehicle (n = 5 mice per group).

696 **d-f.** Effect of LEV treatment in mice with patient-derived DMG xenografts, SU-DIPGVI  
697 (vehicle, n = 3; LEV, n = 5; **d.**), SU-DIPGXIII-FL (vehicle, n = 5 mice; LEV, n = 4 mice; **e.**),  
698 and SU-DIPG50 (vehicle, n = 5 mice; LEV, n = 5 mice; **f.**), two-tailed Student's t-test.

699 Right, representative confocal images of xenografted SU-DIPG50 cells expressing Ki67  
700 (red) and HNA (white). Scale bar, 25  $\mu$ m.

701 **g.-i.** No effect of LEV treatment in mice with patient-derived hemispheric high-grade  
702 glioma xenografts, pcGBM2 (vehicle, n = 8; LEV, n = 10; **g.**), SF0232 (vehicle, n = 5 mice;  
703 LEV, n = 5 mice; **h.**) and SF0238 (vehicle, n = 5 mice; LEV, n = 4 mice), two-tailed

704 Student's t-test. Right, representative confocal images of xenografted SF0238 cells  
705 expressing Ki67 (red) and HNA (white). Scale bar, 25  $\mu$ m. All data are mean  $\pm$  s.e.m. \*P

706 < 0.05, \*\*P < 0.01, \*\*\*P < 0.001.

707

708

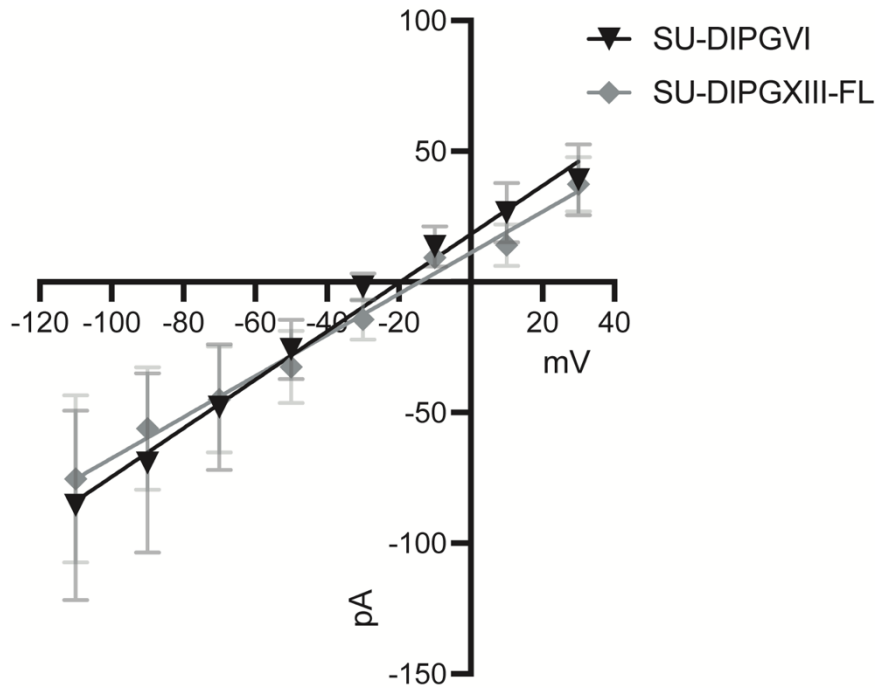

709

710

711

**Extended Data Figure 1. Current-voltage relationship of GABA current in two**

712

**patient-derived DMG xenograft models recorded with perforated patch. Reversal**

713

potential of GABA was -19.61 mV in SU-DIPGVI cells (n = 6 cells from 5 mice), and -

714

14.14 mV in SU-DIPGXIII-FL cells (n=5 cells from 3 mice). All data are mean  $\pm$  s.e.m.

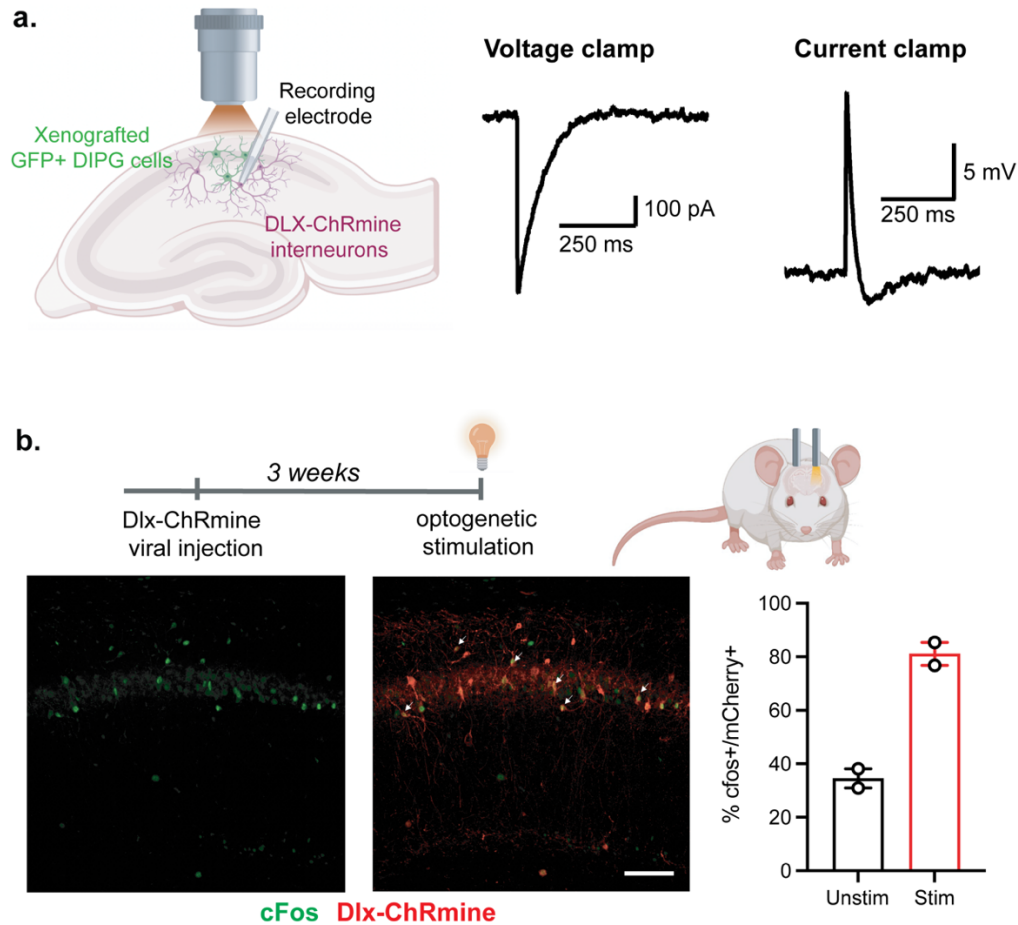

715  
716

717 **Extended Data Figure 2. Optogenetic stimulation of GABAergic interneurons**  
718 **expressing DLX-ChRmine.**

719 **a.** Inward current and corresponding depolarization of GABAergic interneurons  
720 expressing DLX-ChRmine in response to optogenetic stimulation were recorded in using  
721 patch clamp electrophysiology.

722 **b.** Optogenetic stimulation of interneurons expressing DLX-ChRmine (red) lead to  
723 neuronal activity, indicated by cFos expression (green). Arrows indicate co-labeled cells.  
724 Scale bar, 100  $\mu$ m. Above, experimental timeline. Right, quantification of cFos expression  
725 in interneurons in the stimulated hemisphere (stim) is greater than in the unstimulated  
726 hemisphere (unstim, n = 2 mice). All data are mean  $\pm$  s.e.m.

a.

### Lorazepam

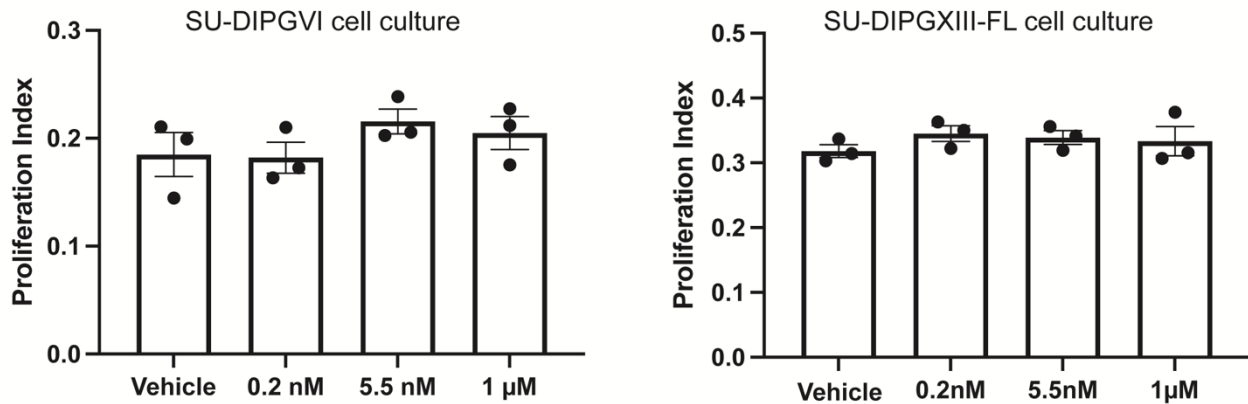

b.

### Levetiracetam

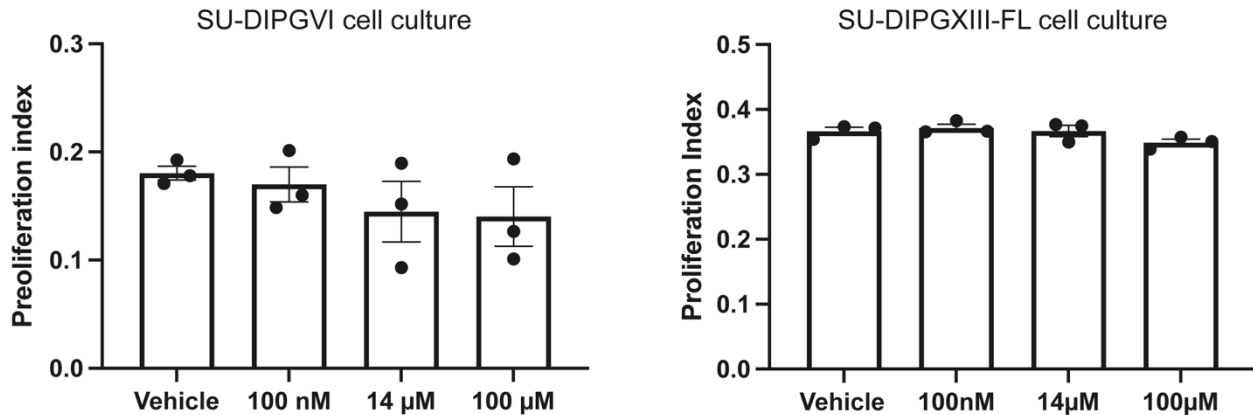

727  
728

729 **Extended Data Figure 3. Lorazepam and levetiracetam have no effect on**  
730 **proliferation of patient-derived DMG cells in monoculture**

731 **a.** Lorazepam treatment in patient-derived DMG cultures SU-DIPGVI and SU-DIPGXIII-  
732 FL had no effect on proliferation (n = 3 wells per group).

733 **b.** Levetiracetam treatment in patient-derived DMG cultures SU-DIPGVI and SU-  
734 DIPGXIII-FL had no effect on proliferation (n = 3 wells per group). All data are mean ±  
735 s.e.m. Two-tailed Student's t-test.

736  
737

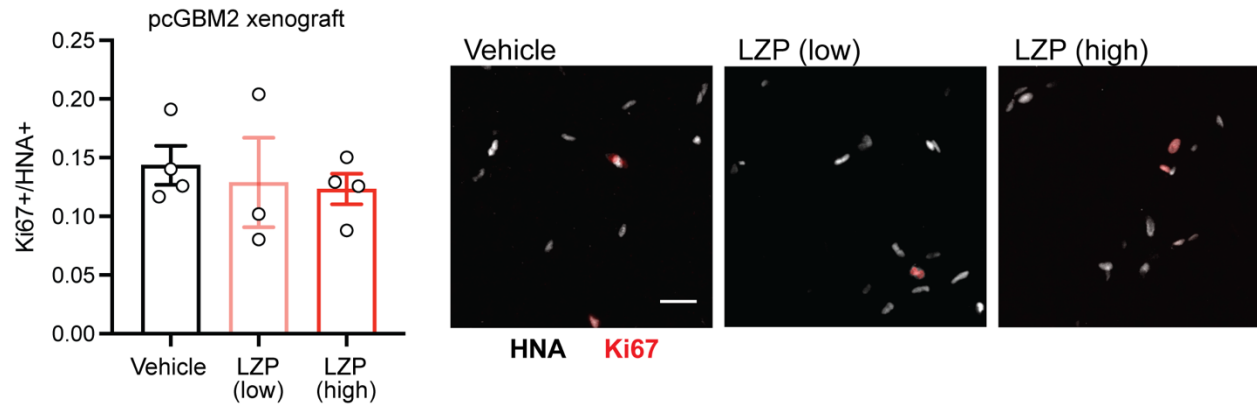

738

739 **Extended Data Figure 4. Lorazepam has no effect on H3/IDH WT pediatric GBM. LZP**

740 treatment in mice with patient-derived pcGBM2 xenografts has no effect on cell

741 proliferation (vehicle, n = 4 mice; low dose, n = 3 mice; high dose, n = 4 mice).

742 Representative confocal images of xenografted pcGBM2 cells expressing Ki67 (red) and

743 HNA (white; right). Scale bar, 25  $\mu$ m. All data are mean  $\pm$  s.e.m. One-way ANOVA.

744



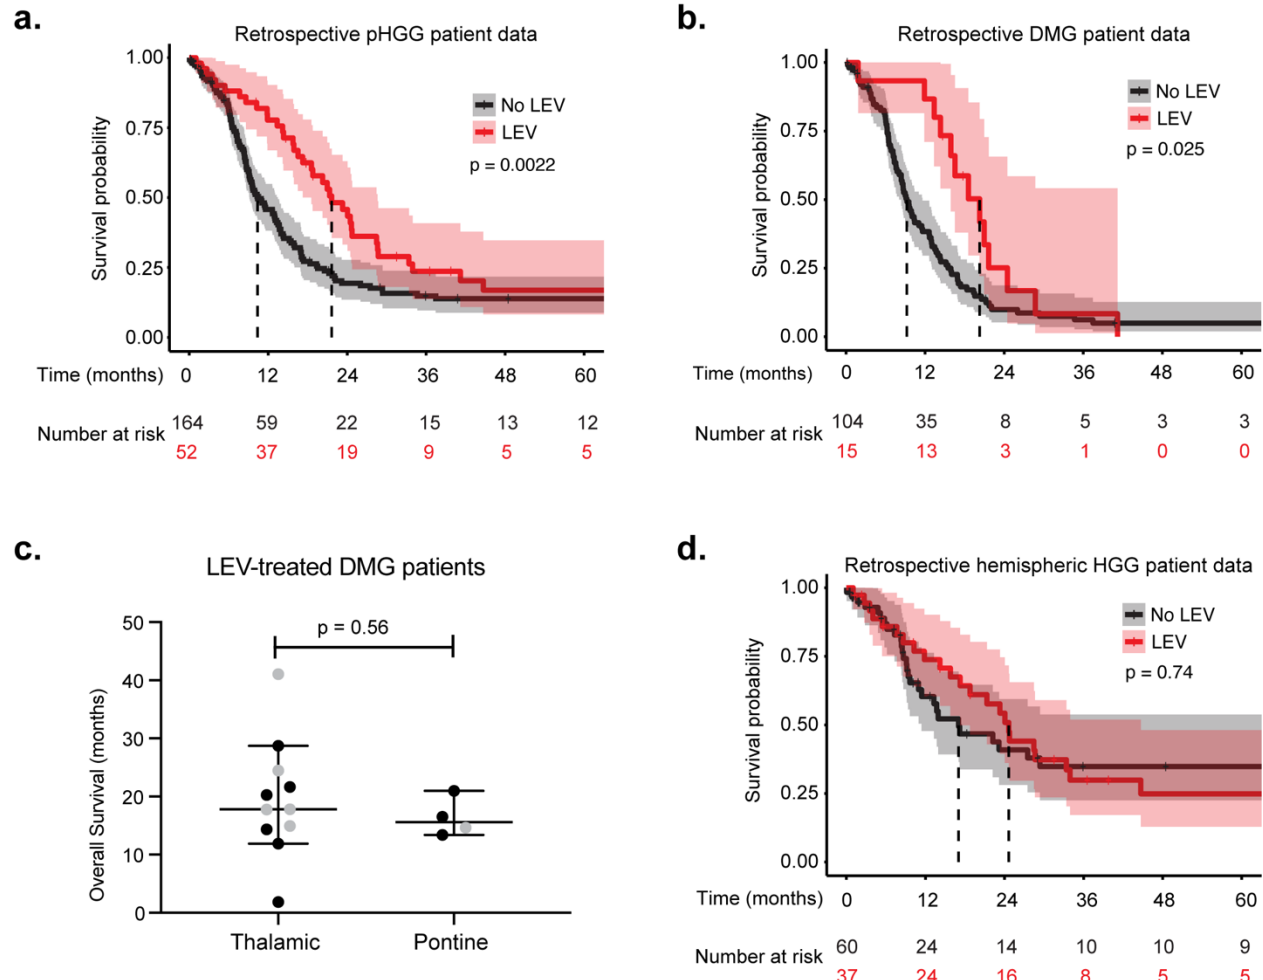

745

746 **Extended Data Figure 5. Effect of levetiracetam on overall survival in retrospective,**  
 747 **real-world patient data.**

748 **a.** All pediatric high-grade gliomas: Kaplan–Meier overall survival (OS) curves of  
 749 retrospective data from Stanford University (1990–2020) and University of Michigan  
 750 (2012–2021) patient databases (n=216), showing pediatric high-grade glioma (pHGG)  
 751 patients treated with LEV (LEV: median OS = 21.7 months, n = 52; no LEV: median OS=  
 752 10.4 months, n = 164).

753 **b.** Diffuse midline gliomas: Kaplan–Meier overall survival (OS) curves of retrospective  
 754 data from DMG patients treated with LEV (LEV: median OS = 20.3 months, n = 15; no  
 755 LEV: median OS= 9.2 months, n = 105).

756 **c.** No difference in overall survival of LEV-treated patients with thalamic compared to  
757 pontine DMG (thalamic: n = 11; pontine: n = 4). Grey points are data censored at time of  
758 last follow-up. Data are median  $\pm$  95% CI. n.s. ( $P>0.05$ ), two-tailed Student's t-test.

759 **d.** Hemispheric high-grade gliomas: Kaplan–Meier overall survival (OS) curves of  
760 retrospective data from hemispheric high-grade glioma (HGG) patients treated with LEV  
761 (LEV: OS=24.6 months, n = 37; no LEV: OS = 17.0 months, n = 60).

762

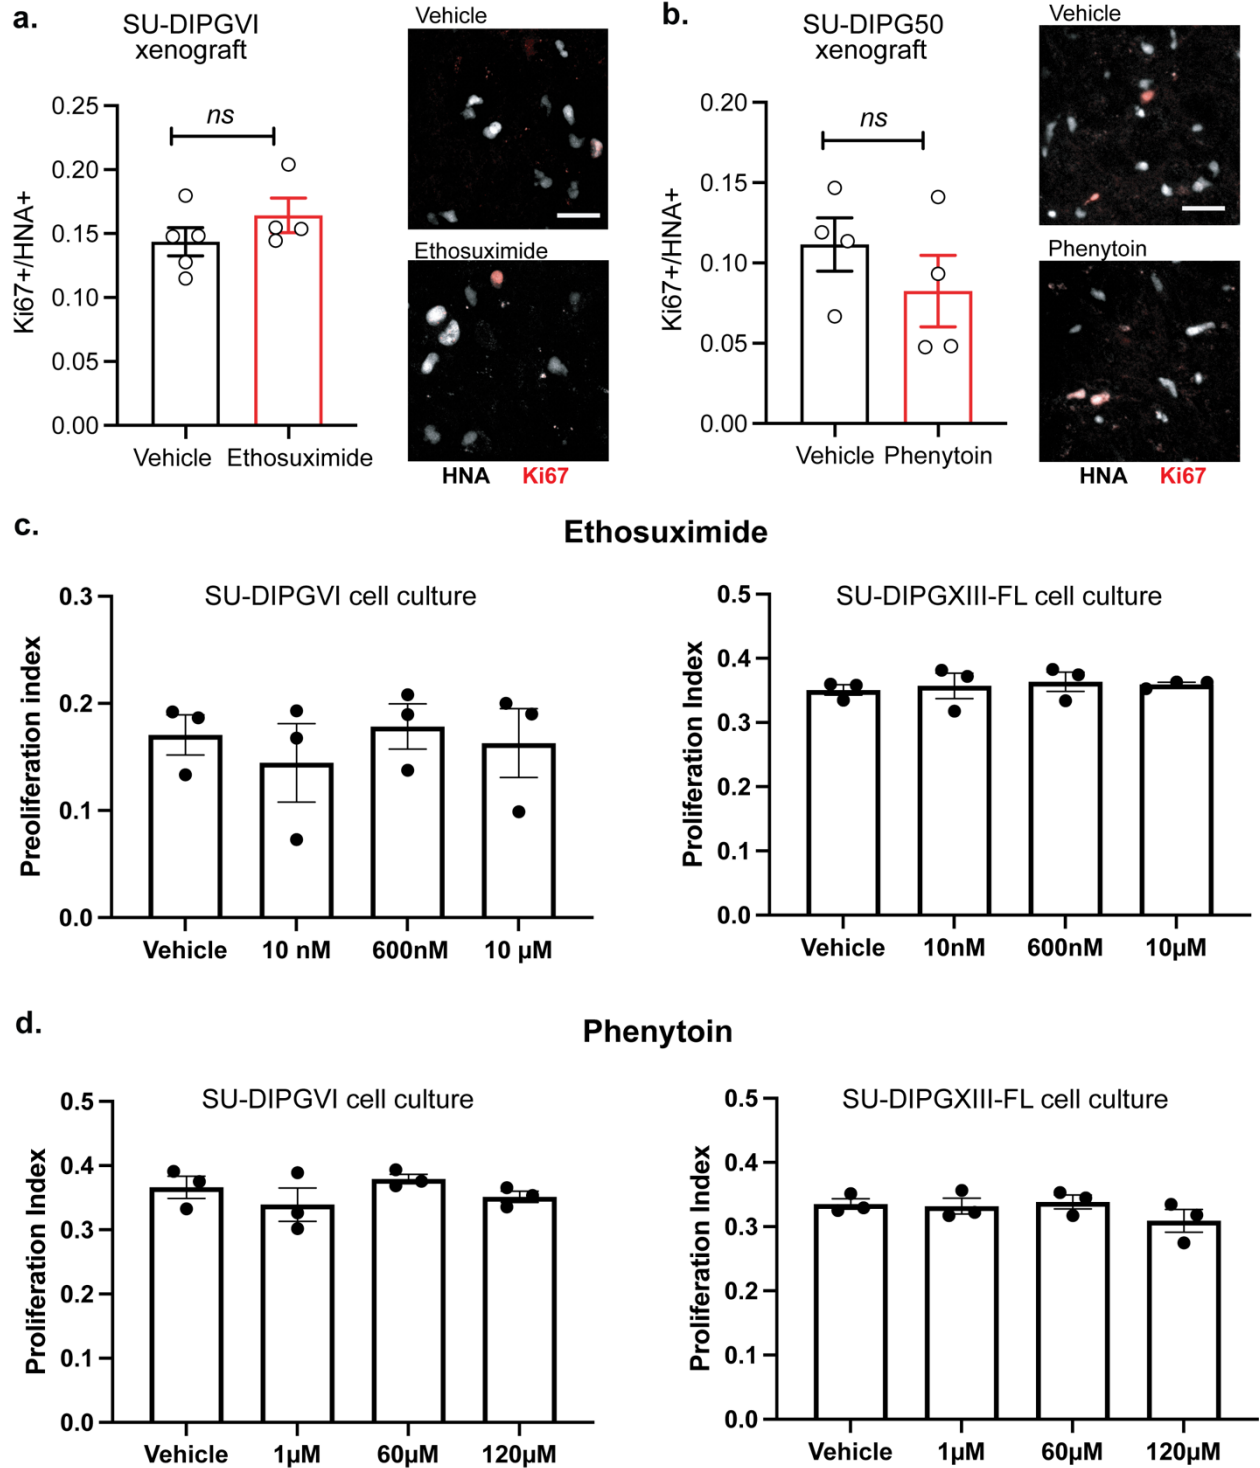

763

764 **Extended Data Figure 6. Antiepileptic drugs ethosuximide and phenytoin do not**

765 **affect DMG proliferation.**

- 766 **a.** Ethosuximide treatment in mice with patient-derived SU-DIPGVI xenografts has no  
767 effect on cell proliferation (vehicle, n = 5 mice; ethosuximide, n = 4 mice). Representative  
768 confocal images of xenografted SU-DIPGVI cells expressing Ki67 (red) and HNA (white;  
769 right). Scale bar, 25  $\mu$ m.
- 770 **b.** Phenytoin treatment in mice with patient-derived SU-DIPG50 xenografts has no effect  
771 on cell proliferation (vehicle, n = 4 mice; phenytoin, n = 4 mice). Representative confocal  
772 images of xenografted SU-DIPG50 cells expressing Ki67 (red) and HNA (white; right).  
773 Scale bar, 25  $\mu$ m.
- 774 **c.** Ethosuximide treatment in patient-derived DMG cultures SU-DIPGVI and SU-DIPGXIII-  
775 FL had no effect on proliferation (n = 3 wells per group).
- 776 **d.** Phenytoin treatment in patient-derived DMG cultures SU-DIPGVI and SU-DIPGXIII-FL  
777 had no effect on proliferation (n = 3 wells per group). All data are mean  $\pm$  s.e.m. Two-  
778 tailed Student's t-test.

779

780

781

#### Literature Cited

782

- 783 1 Venkatesh, H. S. *et al.* Neuronal Activity Promotes Glioma Growth through Neuroligin-3  
784 Secretion. *Cell* **161**, 803-816 (2015). <https://doi.org/10.1016/j.cell.2015.04.012>
- 785 2 Pan, Y. *et al.* NF1 mutation drives neuronal activity-dependent initiation of optic glioma.  
786 *Nature* **594**, 277-282 (2021). <https://doi.org/10.1038/s41586-021-03580-6>
- 787 3 Venkatesh, H. S. *et al.* Electrical and synaptic integration of glioma into neural circuits.  
788 *Nature* **573**, 539-545 (2019). <https://doi.org/10.1038/s41586-019-1563-y>
- 789 4 Venkataramani, V. *et al.* Glutamatergic synaptic input to glioma cells drives brain tumour  
790 progression. *Nature* **573**, 532-538 (2019). <https://doi.org/10.1038/s41586-019-1564-x>
- 791 5 Venkataramani, V. T. K., Frank Winkler. Glioblastoma hijacks neuronal mechanisms for  
792 brain invasion. *Cell in press* (2022).
- 793 6 Mackay, A. *et al.* Integrated Molecular Meta-Analysis of 1,000 Pediatric High-Grade and  
794 Diffuse Intrinsic Pontine Glioma. *Cancer Cell* **32**, 520-537 e525 (2017).  
795 <https://doi.org/10.1016/j.ccell.2017.08.017>
- 796 7 Cooney, T. *et al.* Contemporary survival endpoints: an International Diffuse Intrinsic  
797 Pontine Glioma Registry study. *Neuro Oncol* **19**, 1279-1280 (2017).  
798 <https://doi.org/10.1093/neuonc/nox107>

- 799 8 Schwartzenuber, J. *et al.* Driver mutations in histone H3.3 and chromatin remodelling  
800 genes in paediatric glioblastoma. *Nature* **482**, 226-231 (2012).  
801 <https://doi.org/10.1038/nature10833>
- 802 9 Wu, G. *et al.* Somatic histone H3 alterations in pediatric diffuse intrinsic pontine gliomas  
803 and non-brainstem glioblastomas. *Nat Genet* **44**, 251-253 (2012).  
804 <https://doi.org/10.1038/ng.1102>  
805 ng.1102 [pii]
- 806 10 Khuong-Quang, D. A. *et al.* K27M mutation in histone H3.3 defines clinically and  
807 biologically distinct subgroups of pediatric diffuse intrinsic pontine gliomas. *Acta*  
808 *Neuropathol* **124**, 439-447 (2012). <https://doi.org/10.1007/s00401-012-0998-0>
- 809 11 Monje, M. *et al.* Hedgehog-responsive candidate cell of origin for diffuse intrinsic pontine  
810 glioma. *Proc Natl Acad Sci U S A* **108**, 4453-4458 (2011). <https://doi.org:1101657108> [pii]  
811 10.1073/pnas.1101657108
- 812 12 Nagaraja, S. *et al.* Transcriptional Dependencies in Diffuse Intrinsic Pontine Glioma.  
813 *Cancer Cell* **31**, 635-652 e636 (2017). <https://doi.org:10.1016/j.ccell.2017.03.011>
- 814 13 Filbin, M. G. *et al.* Developmental and oncogenic programs in H3K27M gliomas dissected  
815 by single-cell RNA-seq. *Science* **360**, 331-335 (2018).  
816 <https://doi.org:10.1126/science.aao4750>
- 817 14 Nagaraja, S. *et al.* Histone Variant and Cell Context Determine H3K27M Reprogramming  
818 of the Enhancer Landscape and Oncogenic State. *Molecular cell* **76**, 965-980 e912 (2019).  
819 <https://doi.org:10.1016/j.molcel.2019.08.030>
- 820 15 Haag, D. *et al.* H3.3-K27M drives neural stem cell-specific gliomagenesis in a human  
821 iPSC-derived model. *Cancer Cell* **39**, 407-422 e413 (2021).  
822 <https://doi.org:10.1016/j.ccell.2021.01.005>
- 823 16 Geraghty, A. C. *et al.* Loss of Adaptive Myelination Contributes to Methotrexate  
824 Chemotherapy-Related Cognitive Impairment. *Neuron* **103**, 250-265 e258 (2019).  
825 <https://doi.org:10.1016/j.neuron.2019.04.032>
- 826 17 Makinodan, M., Rosen, K., Ito, S. & Corfas, G. A critical period for social experience-  
827 dependent oligodendrocyte maturation and myelination. *Science* **337**, 1357-1360 (2012).  
828 <https://doi.org:10.1126/science.1220845>
- 829 18 Swire, M., Kotelevtsev, Y., Webb, D. J., Lyons, D. A. & French-Constant, C. Endothelin  
830 signalling mediates experience-dependent myelination in the CNS. *Elife* **8** (2019).  
831 <https://doi.org:10.7554/eLife.49493>
- 832 19 Bergles, D. E., Roberts, J. D., Somogyi, P. & Jahr, C. E. Glutamatergic synapses on  
833 oligodendrocyte precursor cells in the hippocampus. *Nature* **405**, 187-191 (2000).  
834 <https://doi.org:10.1038/35012083>
- 835 20 Lin, S. C. & Bergles, D. E. Synaptic signaling between GABAergic interneurons and  
836 oligodendrocyte precursor cells in the hippocampus. *Nat Neurosci* **7**, 24-32 (2004).  
837 <https://doi.org:10.1038/nn1162>
- 838 21 Mount, C. W., Yalcin, B., Cunliffe-Koehler, K., Sundaresh, S. & Monje, M. Monosynaptic  
839 tracing maps brain-wide afferent oligodendrocyte precursor cell connectivity. *Elife* **8**  
840 (2019). <https://doi.org:10.7554/eLife.49291>
- 841 22 Karadottir, R., Cavelier, P., Bergersen, L. & Attwell, D. NMDA receptors are expressed in  
842 oligodendrocytes and activated in ischaemia. *Nature* **438**, 1162-1166 (2005).  
843 <https://doi.org:10.1038/nature04302>

- 844 23 Kukley, M. *et al.* Glial cells are born with synapses. *FASEB journal : official publication*  
845 *of the Federation of American Societies for Experimental Biology* **22**, 2957-2969 (2008).  
846 <https://doi.org/10.1096/fj.07-090985>
- 847 24 Gibson, E. M. *et al.* Neuronal activity promotes oligodendrogenesis and adaptive  
848 myelination in the mammalian brain. *Science* **344**, 1252304 (2014).  
849 <https://doi.org/10.1126/science.1252304>
- 850 25 Venkatesh, H. S. *et al.* Targeting neuronal activity-regulated neuroligin-3 dependency in  
851 high-grade glioma. *Nature* **549**, 533-537 (2017). <https://doi.org/10.1038/nature24014>
- 852 26 Chen, P. *et al.* Olfactory sensory experience regulates gliomagenesis via neuronal IGF1.  
853 *Nature* (2022). <https://doi.org/10.1038/s41586-022-04719-9>
- 854 27 Rivera, C. *et al.* The K<sup>+</sup>/Cl<sup>-</sup> co-transporter KCC2 renders GABA hyperpolarizing during  
855 neuronal maturation. *Nature* **397**, 251-255 (1999). <https://doi.org/10.1038/16697>
- 856 28 Marshel, J. H. *et al.* Cortical layer-specific critical dynamics triggering perception. *Science*  
857 **365** (2019). <https://doi.org/10.1126/science.aaw5202>
- 858 29 Robison, N. J. & Kieran, M. W. Diffuse intrinsic pontine glioma: a reassessment. *J*  
859 *Neurooncol* **119**, 7-15 (2014). <https://doi.org/10.1007/s11060-014-1448-8>
- 860 30 Taylor, K. R. *et al.* Glioma synapses recruit mechanisms of adaptive plasticity. *bioRxiv*,  
861 2021.2011.2004.467325 (2021). <https://doi.org/10.1101/2021.11.04.467325>
- 862 31 Labrakakis, C., Patt, S., Hartmann, J. & Kettenmann, H. Functional GABA(A) receptors  
863 on human glioma cells. *Eur J Neurosci* **10**, 231-238 (1998).
- 864 32 Pallud, J. *et al.* Effect of Levetiracetam Use Duration on Overall Survival of Isocitrate  
865 Dehydrogenase Wild-Type Glioblastoma in Adults: An Observational Study. *Neurology*  
866 **98**, e125-e140 (2022). <https://doi.org/10.1212/WNL.0000000000013005>
- 867 33 Happold, C. *et al.* Does Valproic Acid or Levetiracetam Improve Survival in  
868 Glioblastoma? A Pooled Analysis of Prospective Clinical Trials in Newly Diagnosed  
869 Glioblastoma. *J Clin Oncol* **34**, 731-739 (2016).  
870 <https://doi.org/10.1200/JCO.2015.63.6563>
- 871 34 Chen, J. S. *et al.* The effect of levetiracetam treatment on survival in patients with  
872 glioblastoma: a systematic review and meta-analysis. *J Neurooncol* **156**, 257-267 (2022).  
873 <https://doi.org/10.1007/s11060-021-03940-2>
- 874 35 Blanchart, A. *et al.* Endogenous GABAA receptor activity suppresses glioma growth.  
875 *Oncogene* **36**, 777-786 (2017). <https://doi.org/10.1038/onc.2016.245>
- 876 36 Tantillo, E. *et al.* Differential roles of pyramidal and fast-spiking, GABAergic neurons in  
877 the control of glioma cell proliferation. *Neurobiol Dis* **141**, 104942 (2020).  
878 <https://doi.org/10.1016/j.nbd.2020.104942>
- 879 37 Qin, E. Y. *et al.* Neural Precursor-Derived Pleiotrophin Mediates Subventricular Zone  
880 Invasion by Glioma. *Cell* **170**, 845-859 e819 (2017).  
881 <https://doi.org/10.1016/j.cell.2017.07.016>
- 882 38 Venteicher, A. S. *et al.* Decoupling genetics, lineages, and microenvironment in IDH-  
883 mutant gliomas by single-cell RNA-seq. *Science* **355** (2017).  
884 <https://doi.org/10.1126/science.aai8478>  
885

**Extended Data Table 1. Diffuse Midline Glioma Patients**

| Institution            | Age (years) | Sex    | Diagnosis                                                                                                                                                                                                                                        | Other treatments                                                                      | Levetiracetam yes/no | Overall survival (days) |
|------------------------|-------------|--------|--------------------------------------------------------------------------------------------------------------------------------------------------------------------------------------------------------------------------------------------------|---------------------------------------------------------------------------------------|----------------------|-------------------------|
| University of Michigan | 7           | Male   | Pontine diffuse midline glioma, H3.3K27M, ATRX Q119*, PPM1D G463fs, PDGFRA amplification, KIT, KDR                                                                                                                                               | XRT                                                                                   | Yes                  | 638                     |
| University of Michigan | 12          | Male   | Thalamic diffuse midline glioma, H3.3K27M, TP53 H179N, ATRX R2197C, TRIO I780fs deletion, subclonal WAS exon 8 loss, Focal amplifications: HGF, MET, GAB2, TBCD Copy gain NTRK2 (4 copies)                                                       | XRT, TMZ, lomustine, Cabozantinib, subtotal resection                                 | Yes                  | 362                     |
| University of Michigan | 9           | Female | Thalamic diffuse midline glioma, H3.1K27M, EGFR A289V, MAX R60Q, PIK3CA R88Q, ARHGAP35 G854E, Subclonal: CEBPZ D78N, DIS3 I779F, MSH3 P64A, BCORL1 K1421fs deletion; subclonal E2F7 L6fs deletion; Copy gain: Chr1q, 2, 5, 7, 15p; UPD: Chr12    | XRT, TMZ, Vimpat, ONC201                                                              | Yes                  | 659                     |
| University of Michigan | 13          | Female | Thalamic diffuse midline glioma H3K27M, BRAF V600E                                                                                                                                                                                               | XRT, TMZ, Dabrafenib, trametinib, Bevacuzimab, Irinotecan, ONC201, subtotal resection | Yes                  | Censored at 745         |
| University of Michigan | 8           | Male   | Thalamic diffuse midline glioma, BRAF V600E, H3WT                                                                                                                                                                                                | XRT, Dabrafenib, trametinib, Trileptal, gabapentin, Vimpat                            | Yes                  | Censored at 540         |
| University of Michigan | 13          | Male   | Thalamic diffuse midline glioma                                                                                                                                                                                                                  | XRT, TMZ, ONC201, Oxcarbazine, Zonisamide                                             | Yes                  | 617                     |
| University of Michigan | 20          | Male   | Pontine diffuse midline glioma, H3K27M mutant                                                                                                                                                                                                    | XRT, TMZ, Depakote, ONC201                                                            | Yes                  | Censored at 446         |
| University of Michigan | 10          | Female | Thalamic diffuse midline, FBXW R465H, STAG2 R110, SETD2 R2165, VAV1 657A, FGFR3 copy gain, CDK11A/B homozygous deletion, gene fusion FGFR3-PHGDH, FGFR3 copy gain, Gain: chromosomes 1q and 7q; Loss: chromosomes 1p, 4p15-16, 6q, and 10q, H3WT | XRT, COG clinical trial ACNS0831, ponatinib                                           | Yes                  | Censored at 1249        |

|                        |    |        |                                                                                                                                                        |                                                                                     |     |                 |
|------------------------|----|--------|--------------------------------------------------------------------------------------------------------------------------------------------------------|-------------------------------------------------------------------------------------|-----|-----------------|
| University of Michigan | 10 | Male   | Thalamic diffuse midline glioma, H3K27M mutation; two TP53 mutations, IDH-1 negative, no MGMT methylation                                              | XRT, ONC201, Bevacizumab, Vimpat, subtotal resection                                | Yes | Censored at 542 |
| University of Michigan | 12 | Male   | Thalamic diffuse midline glioma, H3K27M mutation; ATRX pR1803H, recurrent (ChrX), NTRK2 internal tandem duplication, focal amplification               | XRT, TMZ, ONC201, bevacizumab, entrectinib, subtotal resection                      | Yes | Censored at 454 |
| Stanford University    | 6  | Female | Pontine diffuse midline glioma                                                                                                                         | XRT, Etoposide                                                                      | Yes | 407             |
| Stanford University    | 2  | Female | Pontine diffuse midline glioma                                                                                                                         | XRT                                                                                 | Yes | 503             |
| Stanford University    | 11 | Female | Thalamic diffuse midline glioma, H3WT, IDH1/2 WT, ATRX and TP53 mutated                                                                                | XRT, TMZ, Lomustine, Savolitinib                                                    | Yes | 874             |
| Stanford University    | 13 | Female | Thalamic diffuse midline glioma, H3K27-altered                                                                                                         | NA                                                                                  | Yes | 56              |
| Stanford University    | 11 | Male   | Thalamic diffuse midline glioma                                                                                                                        | XRT, TMZ, etoposide                                                                 | Yes | 436             |
| University of Michigan | 17 | Male   | Pontine/spinal diffuse midline glioma, H3.3 K27M, TP53 H179R, ATRX D1313fs, ERCC5 K917fs, Homozygous loss: NF1<br>Copy loss: BRCA1, CDK12              | XRT, SAHA (HDAC inhibitor), subtotal resection                                      | No  | 316             |
| University of Michigan | 5  | Female | Pontine diffuse midline glioma, PIK3CA; H3.1 K27M                                                                                                      | XRT, everolimus, bevacuzimab, panobinostat, subtotal resection                      | No  | Censored at 588 |
| University of Michigan | 13 | Male   | Pontine diffuse midline glioma, H3.3K27M mutation; FGFR3 activating mutation, loss of BCOR                                                             | XRT, bevacizumab, ponatinib, Panobinostat, pazopanib, everolimus subtotal resection | No  | Censored at 533 |
| University of Michigan | 12 | Male   | Thalamic diffuse midline glioma, somatic mutations in EGFR V292L, mutation/loss in CDKN2C and BCOR1, EGFR T483_G485del, gene fusion ELF4-SMARCA1, H3WT | Proton XRT, TPCV, Osimertinib, bevacizumab                                          | No  | Censored 502    |
| University of Michigan | 8  | Male   | Pontine diffuse midline glioma, H3.3K27M                                                                                                               | XRT, COG phase 1 trial (ADVL1217), everolimus, panobinostat, Depakote               | No  | Censored at 259 |
| University of Michigan | 2  | Male   | Pontine diffuse midline glioma, H3.3K27M, TP53 R273C, CTTNBP2-MET, in frame with MET kinase domain                                                     | XRT, cabozantinib                                                                   | No  | Censored at 246 |



|                        |    |        |                                                                                                                                                                                                                  |                                                                              |    |                  |
|------------------------|----|--------|------------------------------------------------------------------------------------------------------------------------------------------------------------------------------------------------------------------|------------------------------------------------------------------------------|----|------------------|
| University of Michigan | 9  | Female | Pontine diffuse midline glioma, H3.3K27M, PPM1D E525, TP53 R248W, additional non-recurrent missense mutations: AFF2 T385N, ABCC1 T826M, PIK3C2G S1183R, PTPRJ E841fs; Copy gain: Chr 1q, 8q, 17q; Loss of Chr11q | Proton XRT, XRT, ONC201                                                      | No |                  |
| University of Michigan | 1  | Female | Pontine/thalamic diffuse midline glioma, H3K27M                                                                                                                                                                  | NA                                                                           | No | Censored at 29   |
| University of Michigan | 7  | Female | Pontine diffuse midline glioma, H3.1 K27M, ACVR1 R206H, USP9X splice acceptor, exon33, BCOR A603fs deletion                                                                                                      | XRT, ONC201 (arm a), bevacizumab                                             | No | Censored at 626  |
| University of Michigan | 13 | Male   | Thoracic spine diffuse midline glioma, H3.3 K27M, ATRX mutation, FGFR1, H3.3 G34W, PPM1D, PTPN11                                                                                                                 | XRT, ONC201, bevacizumab, subtotal resection                                 | No | Censored at 398  |
| University of Michigan | 17 | Female | Thalamic diffuse midline glioma, H3.3, ATRX, PI3KR1, TP53 mutations                                                                                                                                              | Proton XRT, PTC56, ONC201, Subtotal resection                                | No | Censored at 216  |
| University of Michigan | 2  | Female | Thalamic diffuse midline glioma, H3K27M                                                                                                                                                                          | Proton XRT, ONC201                                                           | No | Censored at 176  |
| University of Michigan | 9  | Female | Pontine diffuse midline glioma, H3.3K27M, PDGFA A153T, TP53 P222_E224delinL, IGF1R focal amplification                                                                                                           | Proton XRT, ONC201, bevacizumab                                              | No | Censored at 459  |
| University of Michigan | 9  | Male   | Tectal/thalamic diffuse midline glioma, H3K27M mutation, KRAS 212R mutation, HGF amplification                                                                                                                   | Proton XRT, vincristine, carboplatin, trametinib, ONC201, Subtotal resection | No | Censored at 2220 |
| Stanford University    | 6  | Female | Pontine diffuse midline glioma                                                                                                                                                                                   | XRT, Cisplatin                                                               | No | 182              |
| Stanford University    | 16 | Male   | Pontine diffuse midline glioma                                                                                                                                                                                   | XRT                                                                          | No | 7                |
| Stanford University    | 5  | Male   | Pontine diffuse midline glioma                                                                                                                                                                                   | XRT, TMZ, Vorinostat                                                         | No | 424              |
| Stanford University    | 7  | Male   | Pontine diffuse midline glioma                                                                                                                                                                                   | XRT, TMZ                                                                     | No | 50               |
| Stanford University    | 7  | Female | Pontine diffuse midline glioma                                                                                                                                                                                   | XRT, TMZ, Valproic Acid                                                      | No | 416              |
| Stanford University    | 15 | Male   | Pontine diffuse midline glioma                                                                                                                                                                                   | XRT                                                                          | No | 125              |
| Stanford University    | 9  | Male   | Pontine diffuse midline glioma                                                                                                                                                                                   | XRT                                                                          | No | 180              |

|                     |    |        |                                                         |                                                                                                                                    |    |                  |
|---------------------|----|--------|---------------------------------------------------------|------------------------------------------------------------------------------------------------------------------------------------|----|------------------|
| Stanford University | 13 | Male   | Pontine diffuse midline glioma, H3.1K27M, MAPKAPK2 gain | XRT, Arsenic Trioxide                                                                                                              | No | 625              |
| Stanford University | 5  | Male   | Pontine diffuse midline glioma                          | XRT                                                                                                                                | No | 58               |
| Stanford University | 7  | Female | Thalamic diffuse midline glioma                         | XRT, TMZ, Arsenic Trioxide, Bevacizumab, Carmustine, Eroltinib, Irinotecan, Sirolimus, diazepam, phenobarbital, Subtotal Resection | No | 1055             |
| Stanford University | 9  | Female | Pontine diffuse midline glioma                          | XRT, TMZ                                                                                                                           | No | 231              |
| Stanford University | 5  | Female | Pontine diffuse midline glioma                          | XRT                                                                                                                                | No | 110              |
| Stanford University | 4  | Female | Pontine diffuse midline glioma                          | XRT, nivolumab                                                                                                                     | No | Censored at 8    |
| Stanford University | 10 | Female | Thalamic diffuse midline glioma, H3K27-altered          | XRT, TMZ                                                                                                                           | No | Censored at 1241 |
| Stanford University | 4  | Female | Pontine diffuse midline glioma                          | NA                                                                                                                                 | No | 116              |
| Stanford University | 3  | Male   | Pontine diffuse midline glioma                          | NA                                                                                                                                 | No | 437              |
| Stanford University | 9  | Male   | Medulla diffuse midline glioma                          | XRT, TMZ, Bevacizumab, Imetelstat, Carmustine, Subtotal Resection                                                                  | No | 2938             |
| Stanford University | 3  | Female | Pontine diffuse midline glioma                          | NA                                                                                                                                 | No | 35               |
| Stanford University | 8  | Female | Pontine diffuse midline glioma                          | XRT                                                                                                                                | No | Censored at 53   |
| Stanford University | 8  | Female | Pontine diffuse midline glioma                          | XRT                                                                                                                                | No | 281              |
| Stanford University | 8  | Male   | Pontine diffuse midline glioma                          | XRT                                                                                                                                | No | 197              |
| Stanford University | 17 | Male   | Ponto-medulla diffuse midline glioma                    | XRT, TMZ, Bevacizumab                                                                                                              | No | 2324             |
| Stanford University | 6  | Female | Pontine diffuse midline glioma, H3.3K27M, HIST1H3B gain | XRT                                                                                                                                | No | 54               |
| Stanford University | 6  | Female | Pontine diffuse midline glioma                          | NA                                                                                                                                 | No | 13               |
| Stanford University | 4  | Male   | Pontine diffuse midline glioma                          | NA                                                                                                                                 | No | 141              |

|                     |    |        |                                                                                                                                                                                                             |                                            |    |                 |
|---------------------|----|--------|-------------------------------------------------------------------------------------------------------------------------------------------------------------------------------------------------------------|--------------------------------------------|----|-----------------|
| Stanford University | 6  | Male   | Pontine diffuse midline glioma                                                                                                                                                                              | XRT                                        | No | 106             |
| Stanford University | 4  | Male   | Pontine diffuse midline glioma                                                                                                                                                                              | XRT, Arsenic Trioxide                      | No | 205             |
| Stanford University | 4  | Male   | Pontine diffuse midline glioma                                                                                                                                                                              | XRT                                        | No | 397             |
| Stanford University | 7  | Male   | Pontine diffuse astrocytoma (WHO III)                                                                                                                                                                       | NA                                         | No | 58              |
| Stanford University | 2  | Female | Pontine diffuse midline glioma                                                                                                                                                                              | NA                                         | No | 1140            |
| Stanford University | 3  | Male   | Pontine diffuse midline glioma                                                                                                                                                                              | XRT                                        | No | 487             |
| Stanford University | 4  | Male   | Pontine diffuse midline glioma                                                                                                                                                                              | XRT                                        | No | 196             |
| Stanford University | 6  | Female | Pontine diffuse midline glioma                                                                                                                                                                              | XRT                                        | No | 223             |
| Stanford University | 11 | Female | Pontine diffuse midline glioma                                                                                                                                                                              | XRT, Vorinostat                            | No | Censored at 201 |
| Stanford University | 7  | Female | Pontine diffuse midline glioma                                                                                                                                                                              | XRT                                        | No | Censored at 5   |
| Stanford University | 10 | Male   | Pontine diffuse midline glioma, H3WT                                                                                                                                                                        | XRT (only 4 doses)                         | No | 66              |
| Stanford University | 3  | Male   | Pontine diffuse midline glioma, H3.1K27M, H3F3A gain, MDM4 gain, ACVR1 point mutation, NTRK1 gain, CDK18 gain, CLK1 gain, CLK2 gain, CLK4 point mutation, NUA2 gain, STK36 gain, PPP1CB gain, MAPKAPK2 gain | XRT, Rindopepimut, GM-CSF                  | No | 471             |
| Stanford University | 11 | Male   | Pontine diffuse midline glioma                                                                                                                                                                              | XRT, TMZ, Veliparib                        | No | 484             |
| Stanford University | 13 | Female | Medulla diffuse midline glioma                                                                                                                                                                              | XRT, TMZ, Rindopepimut, GM-CSF, imetelstat | No | 245             |
| Stanford University | 6  | Female | Pontine diffuse midline glioma                                                                                                                                                                              | XRT, TMZ, Rindopepimut, GM-CSF             | No | 290             |
| Stanford University | 8  | Male   | Cervical glioblastoma (glioblastoma multiforme, astrocytoma WHO IV)                                                                                                                                         | XRT, TMZ, Subtotal Resection               | No | 894             |
| Stanford University | 3  | Male   | Pontine diffuse midline glioma                                                                                                                                                                              | XRT                                        | No | Censored at 105 |
| Stanford University | 12 | Female | Pontine diffuse midline glioma                                                                                                                                                                              | XRT                                        | No | 195             |

|                     |    |        |                                               |                                                                                         |              |                 |
|---------------------|----|--------|-----------------------------------------------|-----------------------------------------------------------------------------------------|--------------|-----------------|
| Stanford University | 8  | Male   | Pontine diffuse midline glioma                | XRT, Bevacizumab, Imetelstat                                                            | No           | 384             |
| Stanford University | 8  | Female | Pontine diffuse midline glioma                | XRT, cabazitaxel                                                                        | No           | 277             |
| Stanford University | 9  | Female | Pontine diffuse midline glioma, H3K27-altered | NA                                                                                      | No           | 78              |
| Stanford University | 2  | Male   | Pontine diffuse midline glioma                | XRT, cabazitaxel                                                                        | No           | 558             |
| Stanford University | 4  | Female | Pontine diffuse midline glioma, H3K27-altered | XRT, TMZ, Bevacizumab                                                                   | No           | Censored at 645 |
| Stanford University | 10 | Female | Pontine diffuse midline glioma                | XRT, TMZ, ABT-888                                                                       | Yes (1 dose) | 235             |
| Stanford University | 5  | Male   | Pontine diffuse midline glioma                | XRT, TMZ, ABT-888                                                                       | No           | 183             |
| Stanford University | 6  | Male   | Pontine diffuse midline glioma                | XRT, nivolumab x4 doses                                                                 | No           | Censored at 21  |
| Stanford University | 6  | Female | Pontine diffuse midline glioma, H3K27-altered | XRT, Subtotal resection, antineoplaston                                                 | No           | 515             |
| Stanford University | 2  | Male   | Pontine diffuse midline glioma                | XRT, Bevacizumab                                                                        | No           | Censored at 25  |
| Stanford University | 14 | Female | Spinal diffuse midline glioma, H3K27-altered  | Subtotal Resection, XRT, TMZ, intrathecal liposomal cytarabine, panobinostat            | No           | 198             |
| Stanford University | 13 | Female | Pontine diffuse midline glioma                | XRT, panobinostat                                                                       | No           | 350             |
| Stanford University | 3  | Female | Pontine diffuse midline glioma                | XRT                                                                                     | No           | Censored at 98  |
| Stanford University | 16 | Male   | Pontine diffuse midline glioma                | XRT, panobinostat                                                                       | No           | 393             |
| Stanford University | 6  | Female | Pontine diffuse midline glioma                | XRT, panobinostat x1 dose                                                               | No           | 266             |
| Stanford University | 6  | Male   | Pontine diffuse midline glioma, H3K27-altered | XRT, TMZ, Subtotal resection, CCNU, pomalidomide, oral cyclophosphamide, oral topotecan | No           | 395             |
| Stanford University | 8  | Male   | Pontine diffuse midline glioma, H3K27-altered | XRT, panobinostat                                                                       | No           | 176             |
| Stanford University | 2  | Male   | Pontine diffuse midline glioma                | XRT                                                                                     | No           | 385             |

|                     |    |        |                                                                                                                                                                                                                                |                                                          |    |                 |
|---------------------|----|--------|--------------------------------------------------------------------------------------------------------------------------------------------------------------------------------------------------------------------------------|----------------------------------------------------------|----|-----------------|
| Stanford University | 6  | Male   | Pontine diffuse midline glioma                                                                                                                                                                                                 | XRT                                                      | No | Censored at 39  |
| Stanford University | 7  | Male   | Pontine diffuse midline glioma, H3K27-altered                                                                                                                                                                                  | XRT                                                      | No | 185             |
| Stanford University | 5  | Male   | Pontine diffuse midline glioma, H3K27-altered                                                                                                                                                                                  | XRT                                                      | No | Censored at 187 |
| Stanford University | 10 | Male   | Pontine diffuse midline glioma                                                                                                                                                                                                 | XRT, ONC201                                              | No | 190             |
| Stanford University | 2  | Male   | Pontine diffuse midline glioma                                                                                                                                                                                                 | XRT                                                      | No | 462             |
| Stanford University | 5  | Male   | Pontine diffuse midline glioma, H3WT, TP53 loss and point mutation, PDGFR loss, HDAC3 loss, CDK1 gain, CLK4 loss, MAPK7 loss, MYLK loss, TGFBR2 loss, GSK3B loss, PSMB5 gain, PIK3CB loss, HSPBAP1 loss, MDM2 gain, AURKB loss | XRT (only two fractions)                                 | No | 217             |
| Stanford University | 1  | Male   | Pontine diffuse midline glioma                                                                                                                                                                                                 | XRT, Cisplatin, Cyclophosphamide, Etoposide, Vincristine | No | 792             |
| Stanford University | 4  | Female | Pontine diffuse midline glioma                                                                                                                                                                                                 | XRT, Etoposide                                           | No | 410             |
| Stanford University | 8  | Female | Pontine diffuse midline glioma                                                                                                                                                                                                 | XRT, Etoposide, Topotecan                                | No | 646             |
| Stanford University | 9  | Female | Pontine diffuse midline glioma                                                                                                                                                                                                 | XRT, TMZ, Etoposide, Thalidomide                         | No | 514             |
| Stanford University | 5  | Male   | Pontine diffuse midline glioma                                                                                                                                                                                                 | XRT                                                      | No | 230             |
| Stanford University | 5  | Female | Pontine diffuse midline glioma                                                                                                                                                                                                 | XRT                                                      | No | 255             |
| Stanford University | 4  | Female | Pontine diffuse midline glioma                                                                                                                                                                                                 | XRT, Cyclosporine, Etoposide, Vincristine                | No | 291             |
| Stanford University | 5  | Female | Pontine diffuse midline glioma                                                                                                                                                                                                 | XRT                                                      | No | 255             |
| Stanford University | 4  | Male   | Pontine diffuse midline glioma                                                                                                                                                                                                 | XRT                                                      | No | 314             |
| Stanford University | 6  | Female | Pontine diffuse midline glioma                                                                                                                                                                                                 | XRT, Cyclosporine, Etoposide, Vincristine                | No | 222             |
| Stanford University | 5  | Female | Pontine diffuse midline glioma                                                                                                                                                                                                 | XRT, Etoposide, Vincristine                              | No | 295             |
| Stanford University | 5  | Male   | Pontine diffuse midline glioma                                                                                                                                                                                                 | XRT, Etoposide                                           | No | 305             |

|                     |    |        |                                               |                             |    |                 |
|---------------------|----|--------|-----------------------------------------------|-----------------------------|----|-----------------|
| Stanford University | 11 | Male   | Pontine diffuse midline glioma                | XRT, Etoposide, Vincristine | No | 115             |
| Stanford University | 6  | Female | Pontine diffuse midline glioma                | XRT, Etoposide, Vincristine | No | 218             |
| Stanford University | 5  | Male   | Pontine diffuse midline glioma                | XRT, Gadolinium texaphyrin  | No | 273             |
| Stanford University | 4  | Female | Pontine diffuse midline glioma                | XRT, TMZ                    | No | 190             |
| Stanford University | 5  | Female | Pontine diffuse midline glioma                | XRT, TMZ                    | No | 302             |
| Stanford University | 6  | Female | Pontine diffuse midline glioma                | XRT                         | No | 336             |
| Stanford University | 8  | Female | Pontine diffuse midline glioma                | XRT                         | No | 434             |
| Stanford University | 7  | Female | Pontine diffuse midline glioma                | XRT, Gadolinium texaphyrin  | No | 353             |
| Stanford University | 5  | Male   | Pontine diffuse midline glioma                | XRT                         | No | 160             |
| Stanford University | 12 | Male   | Pontine diffuse midline glioma                | XRT                         | No | Censored at 225 |
| Stanford University | 3  | Male   | Pontine diffuse midline glioma, H3K27-altered | XRT, panobinostat           | No | Censored at 427 |

**Legend:**

XRT = radiation

TMZ = temozolomide

COG = Children's Oncology Group

**Extended Data Table 2. Hemispheric High Grade Glioma Patients**

| Institution            | Age (years) | Sex    | Diagnosis                                                                                                                                                                                                                                                                                                                                                                                    | Other treatments                                                                                                                                      | Levetiracetam yes/no | Overall survival (days) |
|------------------------|-------------|--------|----------------------------------------------------------------------------------------------------------------------------------------------------------------------------------------------------------------------------------------------------------------------------------------------------------------------------------------------------------------------------------------------|-------------------------------------------------------------------------------------------------------------------------------------------------------|----------------------|-------------------------|
| University of Michigan | 0.6         | Female | Glioblastoma (glioblastoma multiforme, astrocytoma WHO IV), SETD2 S396* mutation, PDGFB amplification (19 copies), H3WT                                                                                                                                                                                                                                                                      | XRT, TMZ, cisplatin, cyclophosphamide, etoposide, vincristine, dasatinib, Tandem transplant, Subtotal Resection                                       | Yes                  | 871                     |
| University of Michigan | 16          | Male   | Cortical/hemispheric astrocytoma, PDGFRA mutant, H3WT                                                                                                                                                                                                                                                                                                                                        | XRT, TMZ, Tripleptal, Vimpat, Dasatinib/Everolimus                                                                                                    | Yes                  | 1016                    |
| University of Michigan | 9           | Female | Cortical glioblastoma, TP53 P152L, TP53: Splice donor of exon 4 ATRX R1022* (monoallelic), PRMT2 D95G, Aneuploid CDK4 amplification (chr12; 8 copies), SMARCD1 amplification (chr12; 8 copies), NCOR2 amplification (chr12; 10 copies)                                                                                                                                                       | Subtotal resection                                                                                                                                    | Yes                  | 753                     |
| University of Michigan | 7           | Female | Craniopharyngioma (adamantinomatous), CTNNB1 T41I, activating IQGAP3 S1406N                                                                                                                                                                                                                                                                                                                  | Subtotal Resection                                                                                                                                    | Yes                  | Censored at 12          |
| University of Michigan | 8           | Male   | Glioblastoma (glioblastoma multiforme, astrocytoma WHO IV), Hypermutation (401.9 Mutations/Mb): TP53 R248W, R158, HDICER1 E1705K, MAP4K3 M1, AMER1 R358*, BCOR R1513*, CTNNA2 R882*, CTNNA1 R451*, IDH1 R100*, KMT2A R407*, PTPN2 R354*, NF1 E2207*, ATM I1581fs, BAX E41fs, FLG E160fs, SOS1 L518fs, NR4A2 Q109fs, KMT2C F835fs, Copy gain chr5 (p15.3-p13.2); Copy loss chr4 (q13.1-q22.1) | XRT, proton XRT, TMZ, bevacuzimab, vorinostat, Valproic acid, cytox, doxorubicin, vincristine, ara-c, methotrexate, pembrolizumab, Subtotal Resection | Yes                  | 3285                    |
| University of Michigan | 18          | Female | Anaplastic pleomorphic xanthoastrocytoma, BRAF V600ETP53 AC276GG, NUTM2F R176G, IRS4 Y828*, PKHD1 A3742V, Genome-wide polyploidy CDKN2A/2B homozygous deletion                                                                                                                                                                                                                               | Proton XRT, Debrafenib, trametinib, Subtotal Resection                                                                                                | Yes                  | Censored at 959         |
| University of Michigan | 15          | Male   | Anaplastic astrocytoma, IDH1 R123H-negative, 17.7 Mutations/Mb                                                                                                                                                                                                                                                                                                                               | Proton XRT, Pembrolizumab, Bevacuzimab, vimpat                                                                                                        | Yes                  | 480                     |

|                        |    |        |                                                                                                                                                                                                                                                                                                                                                |                                                       |     |                 |
|------------------------|----|--------|------------------------------------------------------------------------------------------------------------------------------------------------------------------------------------------------------------------------------------------------------------------------------------------------------------------------------------------------|-------------------------------------------------------|-----|-----------------|
|                        |    |        | Microsatellite instability (MSI) signature noted TP53 R273C, PTPN11 A72V, PIK3CA Q546R, MITF R110* stopgain, NF1 D2346fs, NF1 G675fs, MSH3 K383fs, WRN E510del, Additional frame-shift mutations: CBX5 K106fs, PDS5B K1318fs, SETD1B H8fs, DDR1 P483fs, TET1 K23fs, SMC5 I939fs, SETD2 N1396fs, TET3 N351fs, copy loss chr14; copy gain chr17q |                                                       |     |                 |
| University of Michigan | 15 | Male   | Diffuse astrocytoma                                                                                                                                                                                                                                                                                                                            | XRT, TMZ, Everolimus, Lacosamide                      | Yes | 233             |
| University of Michigan | 11 | Male   | Anaplastic astrocytoma, TP53 I195T, NF1 R440* stopgain, ERBB2 K831T, SCN5A E1060* stopgain, E1070Q, DOCK2 T1279M, ECT2L R233P, Amplifications: Chr3 (CTNNB1, ETV5, SOX2); chr13 (IRS2)                                                                                                                                                         | XRT, TMZ, Depakote                                    | Yes | 82              |
| University of Michigan | 18 | Male   | Anaplastic astrocytoma (astrocytoma WHO III), ATRX R2178G, PTPN11 Q510L, MYH11 R449Q, E2F1 R166C, POU5F1B R230Q, MYB amplification (exon 1 to 9), Copy loss chr1p-ter, 3p, 2p; UPD chr11p                                                                                                                                                      | Vimpat, Gross Total Resection                         | Yes | Censored at 572 |
| University of Michigan | 16 | Female | Glioblastoma (glioblastoma multiforme, astrocytoma WHO IV), H3.3 G34R, ATRX E1461* stopgain, GRM3 L91F, PDGFRA P250S, TP53 D186fs insertion, Aneuploidy (polyploidy)                                                                                                                                                                           | XRT, TMZ, lomustine, Subtotal Resection               | Yes | Censored at 309 |
| University of Michigan | 18 | Male   | Anaplastic astrocytoma (astrocytoma WHO III), ATRX S1379* stopgain, NRG3 P289H, CDKN2A/2B deletion, PTPRM deletion, PTPN2 deletion, Copy loss: chr1p, 5q, 11q, 13, 14 UPD: chr17p (TP53), chr4q, 20p                                                                                                                                           | XRT, TMZ, Irinotecan, Palbociclib, Subtotal Resection | Yes | 165             |
| University of Michigan | 1  | Female | Anaplastic astrocytoma (astrocytoma WHO III)                                                                                                                                                                                                                                                                                                   | Larotrectinib, Vigabatrin                             | Yes | Censored at 169 |
| Stanford University    | 6  | Female | Thalamic and medial temporal lobes anaplastic astrocytoma (astrocytoma WHO III)                                                                                                                                                                                                                                                                | XRT, TMZ, Lomustine                                   | Yes | 277             |



|                     |     |        |                                                                  |                                                                                                                                                        |     |                  |
|---------------------|-----|--------|------------------------------------------------------------------|--------------------------------------------------------------------------------------------------------------------------------------------------------|-----|------------------|
| Stanford University | 8   | Female | Anaplastic astrocytoma (astrocytoma WHO III)                     | XRT, TMZ                                                                                                                                               | Yes | 404              |
| Stanford University | 12  | Female | Anaplastic astrocytoma (astrocytoma WHO III)                     | XRT, TMZ, Topotecan, oral cyclophosphamide (5 days)                                                                                                    | Yes | 571              |
| Stanford University | 11  | Female | Glioblastoma (glioblastoma multiforme, astrocytoma WHO IV)       | Gross Total Resection                                                                                                                                  | Yes | 31               |
| Stanford University | 20  | Male   | Glioblastoma (glioblastoma multiforme, astrocytoma WHO IV)       | XRT, TMZ, Bevacizumab                                                                                                                                  | Yes | 360              |
| Stanford University | 8   | Male   | Anaplastic astrocytoma (astrocytoma WHO III)                     | XRT, TMZ, Bevacizumab                                                                                                                                  | Yes | 262              |
| Stanford University | 15  | Male   | Glioblastoma (glioblastoma multiforme, astrocytoma WHO IV)       | XRT, TMZ, Celocoxib, Lapatinib, Rindopepimut, GM-CSF, Subtotal Resection                                                                               | Yes | 649              |
| Stanford University | 7   | Male   | Glioblastoma (glioblastoma multiforme, astrocytoma WHO IV)       | XRT, TMZ, Bevacizumab, Cyclophosphamide, Gross Total Resection                                                                                         | Yes | 750              |
| Stanford University | 0.1 | Female | Glioblastoma (glioblastoma multiforme, astrocytoma WHO IV)       | Subtotal resection, TMZ, Carboplatin, Cisplatin, Cyclophosphamide, Erlotinib, Etoposide, Methotrexate, Topotecan, Vincristine, Bevacizumab, Irinotecan | Yes | Censored at 3529 |
| Stanford University | 17  | Male   | Glioblastoma (glioblastoma multiforme, astrocytoma WHO IV)       | XRT, TMZ, Bevacizumab                                                                                                                                  | Yes | 432              |
| Stanford University | 15  | Male   | Glioblastoma (glioblastoma multiforme, astrocytoma WHO IV)       |                                                                                                                                                        | Yes | Censored at 38   |
| Stanford University | 2   | Male   | Glioblastoma (glioblastoma multiforme, astrocytoma WHO IV), H3WT | Carboplatin, Cisplatin, Cyclophosphamide, Erlotinib, Etoposide, Methotrexate, Topotecan, Vincristine, Gross Total Resection                            | Yes | Censored at 2504 |
| Stanford University | 24  | Female | Glioblastoma (glioblastoma multiforme, astrocytoma WHO IV)       | XRT, TMZ, Bevacizumab, Cyberknife, Carmustine, Erlotinib, Gross Total Resection                                                                        | Yes | 525              |
| Stanford University | 2   | Male   | Glioblastoma (glioblastoma multiforme, astrocytoma WHO IV)       | Subtotal Resection                                                                                                                                     | Yes | 107              |
| Stanford University | 12  | Female | Glioblastoma (glioblastoma multiforme, astrocytoma WHO IV)       | XRT, TMZ, Bevacizumab, etoposide, Subtotal Resection                                                                                                   | Yes | 709              |
| Stanford University | 1   | Male   | Glioblastoma (glioblastoma multiforme, astrocytoma WHO IV)       | Carboplatin, Cisplatin, Cyclophosphamide, Erlotinib, Etoposide, Methotrexate,                                                                          | Yes | Censored at 2284 |

|                        |     |        |                                                                                                                         |                                                                                           |     |                  |
|------------------------|-----|--------|-------------------------------------------------------------------------------------------------------------------------|-------------------------------------------------------------------------------------------|-----|------------------|
|                        |     |        |                                                                                                                         | Topotecan, Vincristine, Gross Total Resection                                             |     |                  |
| Stanford University    | 10  | Female | Anaplastic astrocytoma (astrocytoma WHO III)                                                                            | XRT, TMZ, Bevacizumab, Carmustine, Irinotecan                                             | Yes | Censored at 1093 |
| Stanford University    | 18  | Female | Glioblastoma (glioblastoma multiforme, astrocytoma WHO IV)                                                              | XRT, TMZ                                                                                  | Yes | 122              |
| Stanford University    | 12  | Female | Glioblastoma (glioblastoma multiforme, astrocytoma WHO IV)                                                              | XRT, Cisplatin, Cyclophosphamide, Etoposide, Vincristine, cabazitaxel, Subtotal resection | Yes | Censored at 1112 |
| Stanford University    | 0.3 | Male   | Glioblastoma (glioblastoma multiforme, astrocytoma WHO IV)                                                              | Cisplatin, Cyclophosphamide, Vincristine, topotecan, erlotinib, Gross Total Resection     | Yes | Censored at 1210 |
| Stanford University    | 15  | Male   | Glioblastoma (glioblastoma multiforme, astrocytoma WHO IV)                                                              | XRT, TMZ, CCNU, Bevacizumab, subtotal resection                                           | Yes | 732              |
| Stanford University    | 7   | Male   | Anaplastic astrocytoma (astrocytoma WHO III)                                                                            | XRT, TMZ, Bevacizumab, Optune, Irinotecan, Subtotal Resection                             | Yes | 1360             |
| Stanford University    | 18  | Female | Glioblastoma (glioblastoma multiforme, astrocytoma WHO IV)                                                              | XRT, TMZ, Bevacizumab, Erlotinib, Near Total Resection                                    | Yes | 312              |
| Stanford University    | 3   | Male   | Pilocytic astrocytoma (WHO I), relapsed as anaplastic astrocytoma (WHO III)                                             | XRT, TMZ, Bleomycin, P-32, gross total resection                                          | Yes | Censored at 9280 |
| Stanford University    | 17  | Female | Anaplastic astrocytoma (astrocytoma WHO III)                                                                            | XRT, subtotal resection, TMZ, Bevacizumab, Irinotecan                                     | Yes | 1033             |
| Stanford University    | 11  | Female | Anaplastic astrocytoma (astrocytoma WHO III)                                                                            | XRT, TMZ, Etoposide, Irinotecan, Oxaliplatin, Subtotal Resection                          | Yes | 866              |
| Stanford University    | 0.4 | Female | Glioblastoma (glioblastoma multiforme, astrocytoma WHO IV), H3WT                                                        | Antineoplastons, etoposide, Bevacizumab, Gross Total Resection                            | Yes | Censored at 432  |
| Stanford University    | 20  | Female | Glioblastoma (glioblastoma multiforme, astrocytoma WHO IV)                                                              | XRT, TMZ, Gross Total Resection                                                           | Yes | Censored at 70   |
| University of Michigan | 14  | Male   | Right Parietal Glioblastoma Multiforme, somatic TSC2 R611W mutation, homozygous deletion of PAK1, germline loss of TP53 | Proton XRT, everolimus, Gross total resection                                             | No  | Censored at 1953 |
| University of Michigan | 16  | Female | Glioblastoma multiforme, PDGFRRR V536E and P577R, STAG2 R263W                                                           | XRT, dasatinib, etoposide, subtotal resection                                             | No  | Censored at 203  |
| University of Michigan | 15  | Male   | Pleomorphic, xanthoastrocytoma, grade 2, BRAF V600E positive                                                            | Proton XRT, subtotal resection                                                            | No  | Censored at 836  |
| University of Michigan | 7   | Female | Anaplastic ependymoma, PF-EPN-A, 1q and 5p gain                                                                         | Proton XRT, Gross total resection                                                         | No  | Censored at 811  |

|                     |     |        |                                                                            |                                                                                                              |    |                  |
|---------------------|-----|--------|----------------------------------------------------------------------------|--------------------------------------------------------------------------------------------------------------|----|------------------|
| Stanford University | 20  | Male   | Anaplastic astrocytoma (astrocytoma WHO III)                               | XRT, Carboplatin, Lomustine, Procarbazine, Vincristine                                                       | No | 417              |
| Stanford University | 10  | Male   | Anaplastic astrocytoma (astrocytoma WHO III)                               | XRT, TMZ, Etoposide, Thalidomide, Subtotal Resection                                                         | No | 252              |
| Stanford University | 0.8 | Male   | Glioblastoma (glioblastoma multiforme, astrocytoma WHO IV)                 | Etoposide, Subtotal Resection                                                                                | No | 146              |
| Stanford University | 16  | Male   | Anaplastic astrocytoma (astrocytoma WHO III)                               | XRT, TMZ, Subtotal Resection                                                                                 | No | Censored at 57   |
| Stanford University | 17  | Male   | Glioblastoma (glioblastoma multiforme, astrocytoma WHO IV)                 | XRT, TMZ, Oxaliplatin, Subtotal Resection                                                                    | No | Censored at 386  |
| Stanford University | 15  | Female | Glioblastoma (glioblastoma multiforme, astrocytoma WHO IV)                 | XRT, TMZ, Subtotal Resection                                                                                 | No | Censored at 61   |
| Stanford University | 2   | Female | Anaplastic astrocytoma (astrocytoma WHO III)                               | Gross Total Resection                                                                                        | No | Censored at 26   |
| Stanford University | 17  | Female | Anaplastic astrocytoma (astrocytoma WHO III), H3WT                         | XRT, Subtotal Resection                                                                                      | No | Censored at 411  |
| Stanford University | 4   | Male   | Anaplastic astrocytoma (astrocytoma WHO III)                               | Gross Total Resection                                                                                        | No | Censored at 32   |
| Stanford University | 9   | Female | Glioblastoma (glioblastoma multiforme, astrocytoma WHO IV)                 | XRT, TMZ                                                                                                     | No | 25               |
| Stanford University | 14  | Male   | Glioblastoma (glioblastoma multiforme, astrocytoma WHO IV)                 | XRT, TMZ, Lomustine, Subtotal Resection                                                                      | No | 285              |
| Stanford University | 0   | Male   | Glioblastoma (glioblastoma multiforme, astrocytoma WHO IV)                 | TMZ, Lomustine, Subtotal Resection                                                                           | No | Censored at 17   |
| Stanford University | 17  | Female | Thalamic glioblastoma (glioblastoma multiforme, astrocytoma WHO IV)        | XRT, TMZ, Lomustine, Bevacizumab                                                                             | No | 837              |
| Stanford University | 16  | Female | Glioblastoma (glioblastoma multiforme, astrocytoma WHO IV)                 | XRT, TMZ, Carboplatin, Cisplatin, Cyclophosphamide, Vincristine, Bevacizumab, Irinotecan, Subtotal Resection | No | Censored at 2067 |
| Stanford University | 13  | Female | Posterior fossa glioblastoma (glioblastoma multiforme, astrocytoma WHO IV) | XRT, TMZ, Bevacizumab, Imatinib mesylate                                                                     | No | 523              |
| Stanford University | 11  | Female | Glioblastoma (glioblastoma multiforme, astrocytoma WHO IV)                 | XRT, TMZ, Bevacizumab, Subtotal Resection, BCNU, irinotecan                                                  | No | 705              |
| Stanford University | 10  | Male   | Glioblastoma (glioblastoma multiforme, astrocytoma WHO IV)                 | XRT, TMZ, Bevacizumab, Cediranib, Carmustine, Irinotecan, Gross Total Resection                              | No | 518              |
| Stanford University | 9   | Female | Pontine and cerebellar anaplastic astrocytoma (astrocytoma WHO III)        | XRT, Arsenic Trioxide                                                                                        | No | Censored at 220  |

|                     |                                         |        |                                                                           |                                                                                           |    |                  |
|---------------------|-----------------------------------------|--------|---------------------------------------------------------------------------|-------------------------------------------------------------------------------------------|----|------------------|
| Stanford University | 11                                      | Female | Glioblastoma (glioblastoma multiforme, astrocytoma WHO IV)                | XRT, TMZ, Arsenic Trioxide, Bevacizumab, Irinotecan, Cyclophosphamide, subtotal resection | No | 424              |
| Stanford University | 16                                      | Male   | Anaplastic astrocytoma (astrocytoma WHO III), H3WT                        | XRT, TMZ, Subtotal Resection                                                              | No | Censored at 3893 |
| Stanford University | 6                                       | Male   | Glioblastoma (glioblastoma multiforme, astrocytoma WHO IV)                | NA                                                                                        | No | Censored at 12   |
| Stanford University | 0                                       | Female | Glioblastoma (glioblastoma multiforme, astrocytoma WHO IV)                | Subtotal Resection                                                                        | No | 1                |
| Stanford University | 11                                      | Female | Anaplastic astrocytoma (astrocytoma WHO III)                              | XRT, TMZ, Bevacizumab, Etoposide                                                          | No | 258              |
| Stanford University | 9                                       | Male   | Glioblastoma (glioblastoma multiforme, astrocytoma WHO IV)                | XRT, TMZ, Bevacizumab                                                                     | No | 333              |
| Stanford University | 9                                       | Female | Glioblastoma (glioblastoma multiforme, astrocytoma WHO IV)                | XRT, TMZ, Bevacizumab, Lomustine, Gross Total Resection                                   | No | Censored at 331  |
| Stanford University | 7                                       | Female | Thalamic anaplastic astrocytoma (astrocytoma WHO III)                     | XRT, TMZ, Carboplatin, Vincristine                                                        | No | Censored at 308  |
| Stanford University | 2                                       | Female | Glioblastoma (glioblastoma multiforme, astrocytoma WHO IV), H3WT          | XRT, TMZ, Vorinostat, Gross Total Resection                                               | No | Censored at 556  |
| Stanford University | 11                                      | Female | Diffuse astrocytoma (astrocytoma WHO II)                                  | Gross Total Resection                                                                     | No | Censored at 1475 |
| Stanford University | 4                                       | Female | Anaplastic astrocytoma (astrocytoma WHO III)                              | Gross Total Resection                                                                     | No | Censored at 4830 |
| Stanford University | 9                                       | Female | Anaplastic astrocytoma (astrocytoma WHO III)                              | XRT, TMZ, Lomustine                                                                       | No | Censored at 249  |
| Stanford University | <i>in utero</i> (at 36-week ultrasound) | Female | Glioblastoma (glioblastoma multiforme, astrocytoma WHO IV), H3WT, IDH WT  | Etoposide, Carboplatin, Cyclophosphamide, Vincristine                                     | No | Censored at 883  |
| Stanford University | 5                                       | Female | Glioblastoma (glioblastoma multiforme, astrocytoma WHO IV), H3K27-altered |                                                                                           | No | Censored at 161  |
| Stanford University | 2                                       | Male   | Mixed malignant germ cell tumor                                           | XRT, Carboplatin, Etoposide, Ifosfamide, Subtotal Resection                               | No | 187              |
| Stanford University | 0.6                                     | Male   | Anaplastic astrocytoma (astrocytoma WHO III)                              | Subtotal Resection                                                                        | No | Censored at 30   |
| Stanford University | 0.7                                     | Female | Glioblastoma (glioblastoma multiforme, astrocytoma WHO IV), H3WT          | Cisplatin, Cyclophosphamide, Methotrexate, Vincristine                                    | No | Censored at 262  |

|                     |    |        |                                                            |                                                                                 |    |                  |
|---------------------|----|--------|------------------------------------------------------------|---------------------------------------------------------------------------------|----|------------------|
| Stanford University | 11 | Female | Anaplastic ependymoma                                      | XRT, Carboplatin, Cyclophosphamide, Etoposide, Vincristine                      | No | Censored at 107  |
| Stanford University | 2  | Female | Anaplastic astrocytoma (astrocytoma WHO III), H3WT         | Carboplatin, Vinblastine, Vincristine                                           | No | Censored at 281  |
| Stanford University | 7  | Female | Anaplastic astrocytoma (astrocytoma WHO III)               | XRT, Cisplatin                                                                  | No | 176              |
| Stanford University | 6  | Male   | Anaplastic astrocytoma (astrocytoma WHO III)               | XRT, Cisplatin, Subtotal Resection                                              | No | 157              |
| Stanford University | 9  | Male   | Glioblastoma (glioblastoma multiforme, astrocytoma WHO IV) | Carmustine, Etoposide, 6-thioguanine, Subtotal Resection                        | No | 86               |
| Stanford University | 5  | Female | Anaplastic astrocytoma (astrocytoma WHO III)               | XRT, Carboplatin, Etoposide, Ifosfamide                                         | No | Censored at 308  |
| Stanford University | 10 | Male   | Glioblastoma (glioblastoma multiforme, astrocytoma WHO IV) | XRT, TMZ, Celocoxib, Subtotal Resection                                         | No | Censored at 53   |
| Stanford University | 13 | Male   | Glioblastoma (glioblastoma multiforme, astrocytoma WHO IV) | XRT, Lomustine, Procarbazine, Vincristine, Etoposide, Subtotal Resection        | No | 894              |
| Stanford University | 17 | Female | Glioblastoma (glioblastoma multiforme, astrocytoma WHO IV) | XRT, TMZ, Carmustine, Imatinib mesylate                                         | No | 676              |
| Stanford University | 17 | Female | Glioblastoma (glioblastoma multiforme, astrocytoma WHO IV) | XRT, TMZ                                                                        | No | 293              |
| Stanford University | 14 | Male   | Glioblastoma (glioblastoma multiforme, astrocytoma WHO IV) | XRT, TMZ, Lomustine, Procarbazine, Vincristine, Thalidomide, Subtotal Resection | No | 1993             |
| Stanford University | 12 | Female | Glioblastoma (glioblastoma multiforme, astrocytoma WHO IV) | XRT, Lomustine, Procarbazine, Vincristine, Gross Total Resection                | No | Censored at 4976 |
| Stanford University | 4  | Male   | Glioblastoma (glioblastoma multiforme, astrocytoma WHO IV) | Subtotal Resection                                                              | No | 51               |
| Stanford University | 13 | Male   | Astrocytoma (anaplastic vs pleomorphic xanthoastrocytoma)  | XRT, TMZ, Gross Total Resection                                                 | No | Censored at 3007 |
| Stanford University | 7  | Female | Anaplastic astrocytoma (astrocytoma WHO III)               | XRT, Carmustine, Cisplatin, Topotecan, Subtotal Resection                       | No | 347              |
| Stanford University | 1  | Female | Anaplastic astrocytoma (astrocytoma WHO III)               | XRT, TMZ, Thalidomide                                                           | No | 3852             |
| Stanford University | 2  | Female | Gliosarcoma                                                | XRT, Carmustine, O-6-benzylguanine, Subtotal Resection                          | No | 222              |
| Stanford University | 8  | Female | Anaplastic astrocytoma (astrocytoma WHO III)               | XRT, TMZ, Carmustine, O-6-benzylguanine                                         | No | 279              |

|                     |   |      |                                                                                               |                                                                                  |    |      |
|---------------------|---|------|-----------------------------------------------------------------------------------------------|----------------------------------------------------------------------------------|----|------|
| Stanford University | 2 | Male | Diffuse astrocytoma (WHO II), then glioblastoma (glioblastoma multiforme, astrocytoma WHO IV) | XRT, TMZ, Subtotal Resection, bevacizumab, regorafenib, palbociclib, savolitinib | No | 6957 |
| Stanford University | 7 | Male | Anaplastic astrocytoma (astrocytoma WHO III)                                                  | XRT, TMZ, Imatinib mesylate, Subtotal Resection                                  | No | 263  |

**Legend:**

XRT = radiation

TMZ = temozolomide
